# Supplementary material for: Au-Catalyzed tandem intermolecular hydroalkoxylation/Claisen rearrangement between allylic alcohols and chloroalkynes
Source: Royal Society of Chemistry journal article supplement (doi:10.1039/c9ob00151d), 2019-01-01

## Supporting Information

### Table of Contents

|                                                                                                                                                                                       |      |
|---------------------------------------------------------------------------------------------------------------------------------------------------------------------------------------|------|
| General Information.....                                                                                                                                                              | S-2  |
| General Procedure for the Synthesis of $\gamma,\delta$ -Unsaturated $\alpha$ -Chloroketones via a Tandem Intermolecular Hydroalkoxylation/Claisen Rearrangement (Tables 2 and 3)..... | S-2  |
| Analytical data for the products shown in tables 2 and 3.....                                                                                                                         | S-3  |
| References.....                                                                                                                                                                       | S-9  |
| Copies of $^1\text{H}$ and $^{13}\text{C}$ NMR Spectra.....                                                                                                                           | S-10 |

## General Information

$^1\text{H}$  and  $^{13}\text{C}$  NMR Spectra were recorded on a Bruker AC-500 FT spectrometer (500 MHz and 125 MHz, respectively), a Bruker AC-400 FT spectrometer (400 MHz and 100 MHz, respectively) and a AC-300 FT spectrometer (300 MHz and 75 MHz, respectively) using tetramethylsilane as internal reference. Chemical shifts ( $\delta$ ) and coupling constants ( $J$ ) were expressed in ppm and Hz, respectively. IR spectra were recorded on a Perkin-Elmer 2000 FTIR spectrometer. High resolution mass spectra were recorded on a LC-TOF spectrometer (Micromass). The UV detection was monitored at 254 nm. Melting points were uncorrected.

Analytical grade solvents for the column chromatography were used as received. 1,2-Dichloroethane, acetonitrile and  $\text{CH}_2\text{Cl}_2$  were dried over  $\text{CaH}_2$  and distilled prior to use. DMSO and  $\text{MeNO}_2$  were dried over 4A molecular sieves and distilled prior to use. All the gold complexes <sup>1</sup> and the substrates <sup>2</sup> were prepared following the literature reports. The rest of chemicals were purchased from the Sinopharm Chemical Reagent Co., Meryer, Acros, and Alfa Aesar, and used as received.

## General Procedure for the Synthesis of $\gamma,\delta$ -Unsaturated $\alpha$ -Chloroketones via a Tandem Intermolecular Hydroalkoxylation/Claisen Rearrangement (Tables 2 and 3)

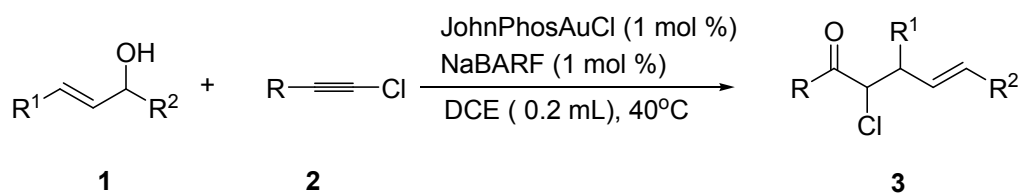

To a solution of allylic alcohol **1** (0.20 mmol) in dry DCE (0.20 mL) were added chloroalkyne **2** (0.24 mmol), JohnPhosAuCl (1.42 mg, 0.0020 mmol) and NaBARF (1.77 mg, 0.0020 mmol) subsequently. The resulting mixture was stirred at 40 °C until no further transformation was detected by TLC analysis. The mixture was cooled to room temperature, and purified by silica gel column chromatography, eluting with petroleum ether/ethyl acetate (100:0 to 10:1), to give  $\gamma,\delta$ -unsaturated  $\alpha$ -chloroketones **3**.

## A 10 mmol Scale Reaction

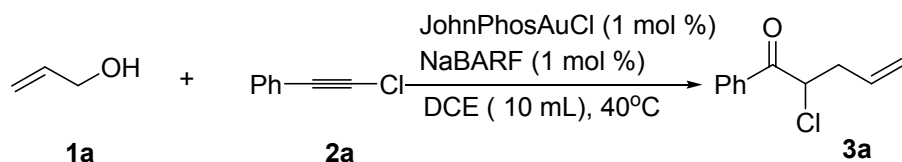

To a solution of allylic alcohol **1a** (0.58 g, 1.3 mL, 10.0 mmol) in dry DCE (10.0 mL) were added chloroalkyne **2a** (1.63 g, 12.0 mmol), JohnPhosAuCl (71.0 mg, 0.10 mmol) and NaBARF (88.5 mg, 0.10 mmol) subsequently. The resulting mixture was stirred at 40 °C for 3 hours. The mixture was cooled to room temperature, and purified by silica gel column chromatography, eluting with petroleum ether, to give  $\gamma,\delta$ -unsaturated  $\alpha$ -chloroketones **3a** (1.89 g) in 97% yield.

### Analytical Data for The Products Shown in Tables 2 and 3

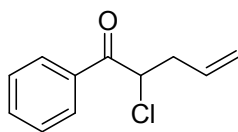

2-chloro-1-phenylpent-4-en-1-one (**3a**),<sup>3</sup> colorless oil (52.0 mg); <sup>1</sup>H NMR (500 MHz, CDCl<sub>3</sub>) δ 8.06 (d, *J* = 8.5 Hz, 2H), 7.63-7.60 (m, 1H), 7.51-7.47 (m, 2H), 5.88-5.82 (m, 1H), 5.22-5.14 (m, 2H), 5.12 (dd, *J* = 7.5 Hz, 6.0 Hz, 2H), 2.97-2.89 (m, 1H), 2.79-2.72 (m, 1H); <sup>13</sup>C NMR (100 MHz, CDCl<sub>3</sub>): 193.0, 134.3, 133.8, 132.9, 128.9, 128.8, 119.0, 56.2, 37.7.

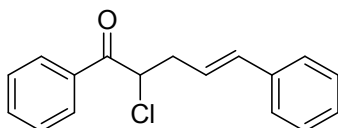

(*E*)-2-chloro-1,5-diphenylpent-4-en-1-one (**3b**),<sup>4</sup> white solid (52.4 mg), m.p. 126-128 °C; <sup>1</sup>H NMR (300 MHz, CDCl<sub>3</sub>) δ 8.02 (d, *J* = 7.2 Hz, 2H), 7.70-7.48 (m, 3H), 7.35-7.20 (m, 5H), 6.54 (d, *J* = 15.9 Hz, 1H), 6.28-6.20 (m, 1H), 5.21 (dd, *J* = 7.5 Hz, 6.6 Hz, 1H), 3.13-3.03 (m, 1H), 2.96-2.85 (m, 1H); <sup>13</sup>C NMR (75 MHz, CDCl<sub>3</sub>): 193.0, 136.9, 134.1, 133.8, 129.0, 128.8, 128.5, 127.6, 126.3, 124.4, 118.4, 56.5, 37.0.

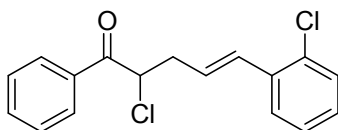

(*E*)-2-chloro-5-(2-chlorophenyl)-1-phenylpent-4-en-1-one (**3c**), white solid (55.3 mg), m.p. 137-138 °C; <sup>1</sup>H NMR (300 MHz, CDCl<sub>3</sub>) δ 8.03 (d, *J* = 7.5 Hz, 2H), 7.63-7.48 (m, 4H), 7.39-7.17 (m, 3H), 6.94 (d, *J* = 15.9 Hz, 1H), 6.32-6.18 (m, 1H), 5.23 (dd, *J* = 7.2 Hz, 6.3 Hz, 1H), 3.17-3.06 (m, 1H), 3.00-2.92 (m, 1H); <sup>13</sup>C NMR (75 MHz, CDCl<sub>3</sub>): 192.4, 138.0, 135.6, 133.9, 130.3, 129.6, 129.0, 128.8, 128.6, 127.7, 127.3, 126.9, 125.7, 56.4, 37.1; IR (film): ν 3059, 3020, 2921, 1600, 1583, 1491, 1450 cm<sup>-1</sup>; HRMS (EI) Calcd for C<sub>17</sub>H<sub>14</sub>Cl<sub>2</sub>O (M): 304.0422. Found: 304.0431.

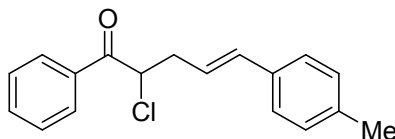

(*E*)-2-chloro-1-phenyl-5-p-tolylpent-4-en-1-one (**3d**),<sup>4</sup> white solid (56.2 mg), m.p. 130-132 °C; <sup>1</sup>H NMR (300 MHz, CDCl<sub>3</sub>) δ 8.02 (d, *J* = 7.2 Hz, 2H), 7.69-7.40 (m, 3H), 7.19 (d, *J* = 6.3 Hz, 2H), 7.11 (d, *J* = 6.6 Hz, 2H), 6.48 (d, *J* = 15.9 Hz, 1H), 6.30-6.12 (m, 1H), 5.09 (dd, *J* = 7.2 Hz, 6.6 Hz, 1H), 3.11-3.03 (m, 1H), 3.98-2.84 (m, 1H), 2.03 (s, 3H); <sup>13</sup>C NMR (75 MHz, CDCl<sub>3</sub>): 193.0, 136.8, 134.0, 133.7, 128.9, 128.7, 128.4, 127.4, 127.3, 126.1, 124.2, 57.0, 37.3, 29.7.

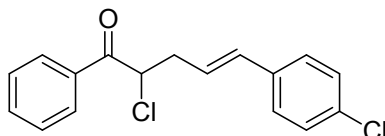

(*E*)-2-chloro-5-(4-chlorophenyl)-1-phenylpent-4-en-1-one (**3e**),<sup>5</sup> white solid (58.0 mg), m.p. 134-136 °C; <sup>1</sup>H NMR (300 MHz, CDCl<sub>3</sub>) δ 8.02 (d, *J* = 7.2 Hz, 2H), 7.65-7.45 (m, 3H), 7.35-7.25 (m, 4H), 6.52 (d, *J* = 15.9 Hz, 1H), 6.25-6.15 (m, 1H), 5.32 (dd, *J* = 7.2 Hz, 6.3 Hz, 1H), 3.11-3.01 (m, 1H), 2.95-2.85 (m, 1H) ; <sup>13</sup>C NMR (75 MHz, CDCl<sub>3</sub>): 193.0, 138.4, 133.8, 132.9, 130.0, 129.7, 129.0, 128.8, 128.7, 127.5, 125.0, 118.7, 56.3, 36.9.

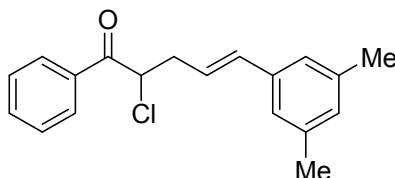

(*E*)-2-chloro-5-(3,5-dimethylphenyl)-1-phenylpent-4-en-1-one (**3f**), white solid (55.4 mg), m.p. 127-129 °C; <sup>1</sup>H NMR (300 MHz, CDCl<sub>3</sub>) δ 8.02 (d, *J* = 7.2 Hz, 2H), 7.59 (d, *J* = 7.5 Hz, 1H), 7.52-7.46 (m, 1.2 Hz, 1H), 7.31 (s, 1H), 7.17 (s, 2H), 6.57 (d, *J* = 15.6 Hz, 1H), 6.24-6.14 (m, 1H), 5.20 (dd, *J* = 7.2 Hz, 6.9 Hz, 1H), 3.14-3.04 (m, 1H), 2.94-2.84 (m, 1H), 1.85 (s, 6H) ; <sup>13</sup>C NMR (75 MHz, CDCl<sub>3</sub>): 193.2, 135.2, 134.0, 131.2, 129.0, 128.7, 126.6, 124.2, 123.4, 122.0, 120.7, 56.5, 37.1, 29.7; IR (film): ν 3055, 3021, 2923, 1600, 1582, 1491, 1459 cm<sup>-1</sup>; HRMS (EI) Calcd for C<sub>19</sub>H<sub>19</sub>ClO (M): 298.8066. Found: 298.8057.

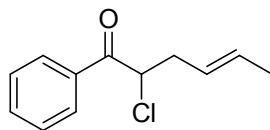

(*E*)-2-chloro-1-phenylhex-4-en-1-one (**3g**),<sup>4</sup> colorless oil (39.5 mg); <sup>1</sup>H NMR (500 MHz, CDCl<sub>3</sub>) δ 8.00 (d, *J* = 8.0 Hz, 2H), 7.62-7.58 (m, 1H), 7.51-7.47 (m, 2H), 5.65-5.57 (m, 1H), 5.48-5.42 (m, 1H), 5.08 (dd, *J* = 7.5 Hz, 6.5 Hz, 1H), 2.89-2.82 (m, 1H), 2.70-2.64 (m, 1H), 1.65 (d, *J* = 6.5 Hz, 3H); <sup>13</sup>C NMR (100 MHz, CDCl<sub>3</sub>): 193.2, 134.4, 133.7, 130.0, 128.9, 125.3, 56.8, 36.7, 18.0.

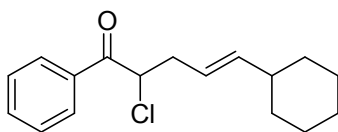

(*E*)-2-chloro-5-cyclohexyl-1-phenylpent-4-en-1-one (**3h**), colorless oil (51.0 mg); <sup>1</sup>H NMR (300 MHz, CDCl<sub>3</sub>) δ 7.99 (d, *J* = 7.8 Hz, 2H), 7.63-7.57 (m, 1H), 7.50 (dd, *J* = 7.8 Hz, 6.9 Hz, 2H), 5.57-5.49 (m, 1H), 5.43-5.30 (m, 1H), 5.08 (dd, *J* = 7.5 Hz, 6.6 Hz, 1H), 2.90-2.80 (m, 1H), 2.72-2.64 (m, 1H), 2.15-2.03 (m, 1H), 1.92-1.65 (m, 6H), 1.34-1.25 (m, 4H); <sup>13</sup>C NMR (75 MHz, CDCl<sub>3</sub>): 193.4, 141.4, 134.8, 133.6, 128.9, 128.7, 121.5, 57.1, 40.6, 37.0, 32.8, 29.7, 25.9; IR (film): ν 3059, 3025, 2926, 1598, 1580, 1492, 1451 cm<sup>-1</sup>; HRMS (EI) Calcd for C<sub>17</sub>H<sub>21</sub>ClO (M): 276.1281. Found: 276.1276.

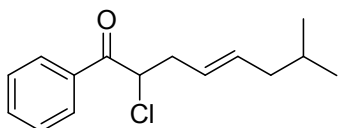

(*E*)-2-chloro-7-methyl-1-phenyloct-4-en-1-one (**3i**),<sup>4</sup> colorless oil (48.5 mg); <sup>1</sup>H NMR (300 MHz, CDCl<sub>3</sub>)  $\delta$  8.00 (d, *J* = 8.1 Hz, 2H), 7.70-7.46 (m, 3H), 5.50-5.32 (m, 2H), 5.11 (dd, *J* = 7.5 Hz, 6.9 Hz, 1H), 2.92-2.81 (m, 1H), 2.73-2.63 (m, 1H), 2.05-1.92 (m, 2H), 1.10-1.04 (m, 1H), 0.93 (d, *J* = 3.3 Hz, 6H); <sup>13</sup>C NMR (75 MHz, CDCl<sub>3</sub>): 191.1, 134.3, 134.0, 128.9, 128.5, 124.8, 120.8, 62.2, 45.9, 36.8, 29.7.

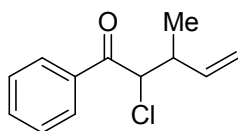

2-chloro-3-methyl-1-phenylpent-4-en-1-one (**3j**),<sup>5</sup> colorless oil (41.2 mg); dr: 80:20; <sup>1</sup>H NMR (500 MHz, CDCl<sub>3</sub>)  $\delta$  7.98 (d, *J* = 8.0 Hz, 2H), 7.62-7.59 (m, 1H), 7.50-7.48 (m, 2H), 5.92-5.84 (m, 0.8H), 5.79-5.72 (m, 0.2H), 5.15-4.99 (m, 3H), 3.08-2.99 (m, 1H), 1.24 (d, *J* = 6.5 Hz, 0.6H), 1.14 (d, *J* = 6.5 Hz, 2.4H); <sup>13</sup>C NMR (100 MHz, CDCl<sub>3</sub>): 193.4, 138.2, 135.0, 133.8, 128.8, 128.7, 116.7, 62.2, 40.9, 40.3, 17.7, 16.2.

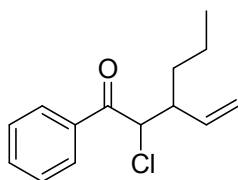

2-chloro-1-phenyl-3-vinylhexan-1-one (**3k**), colorless oil (44.5 mg); dr > 99:1; <sup>1</sup>H NMR (500 MHz, CDCl<sub>3</sub>)  $\delta$  7.95 (d, *J* = 8.5 Hz, 2H), 7.63-7.59 (m, 1H), 7.51-7.48 (m, 2H), 5.75-5.62 (m, 1H), 5.18-5.14 (m, 2H), 5.03 (d, *J* = 7.5 Hz, 1H), 2.90-2.79 (m, 1H), 1.47-1.28 (m, 4H), 0.95-0.86 (m, 3H); <sup>13</sup>C NMR (100 MHz, CDCl<sub>3</sub>): 193.5, 136.5, 135.2, 133.7, 128.9, 128.6, 118.3, 62.0, 46.9, 34.2, 20.3, 13.9; IR (film):  $\nu$  3056, 3020, 2925, 1587, 1588, 1490, 1454 cm<sup>-1</sup>; HRMS (EI) Calcd for C<sub>14</sub>H<sub>17</sub>ClO (M): 236.0968. Found: 236.0975.

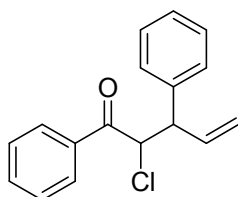

2-chloro-1,3-diphenylpent-4-en-1-one (**3l**), colorless oil (49.7 mg); dr = 60:40; <sup>1</sup>H NMR (500 MHz, CDCl<sub>3</sub>)  $\delta$  7.95 (d, *J* = 8.5 Hz, 2H), 7.63-7.59 (m, 1H), 7.51-7.48 (m, 2H), 6.27-6.19 (m, 0.6H), 5.96-5.93 (m, 0.4H), 5.45-5.06 (m, 3H), 4.30-4.17 (m, 1H); <sup>13</sup>C NMR (100 MHz, CDCl<sub>3</sub>): 193.0, 139.6, 136.8, 133.9, 128.9, 128.8, 128.6, 128.2, 127.3, 126.2, 118.4, 59.4, 58.6, 52.3, 52.2; IR (film):  $\nu$  3057, 3018, 2926, 1600, 1580, 1489, 1453 cm<sup>-1</sup>; HRMS (EI) Calcd for C<sub>17</sub>H<sub>15</sub>ClO (M): 270.0811. Found: 270.0823.

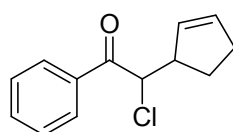

2-chloro-2-(cyclopent-2-enyl)-1-phenylethanone (**3m**),<sup>5</sup> colorless oil (38.7 mg); dr =

55:45;  $^1\text{H}$  NMR (500 MHz,  $\text{CDCl}_3$ )  $\delta$  8.03-7.98 (m, 2H), 7.62-7.58 (m, 1H), 7.51-7.48 (m, 2H), 5.94-5.92 (m, 1H), 5.91-5.88 (m, 0.55H), 5.51-5.49 (m, 0.45H), 4.97 (d,  $J = 8.5$  Hz, 0.55H), 4.92 (d,  $J = 8.5$  Hz, 0.45H), 3.58-3.49 (m, 1H), 2.47-2.33 (m, 2H), 2.24-2.12 (m, 1H), 2.10-1.93 (m, 1H);  $^{13}\text{C}$  NMR (100 MHz,  $\text{CDCl}_3$ ): 193.7, 134.5, 133.7, 130.8, 130.2, 128.9, 128.8, 61.0, 49.0, 32.3, 27.8.

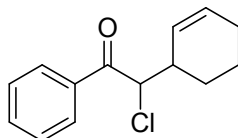

2-chloro-2-(cyclohex-2-enyl)-1-phenylethanone (**3n**),<sup>6</sup> colorless oil (42.1 mg); dr = 50:50;  $^1\text{H}$  NMR (500 MHz,  $\text{CDCl}_3$ )  $\delta$  8.00 (d,  $J = 8.0$  Hz, 2H), 7.62-7.58 (m, 1H), 7.51-7.47 (m, 2H), 5.95-5.89 (m, 1H), 5.82-5.78 (m, 0.5H), 5.44-5.41 (m, 0.5H), 5.00 (d,  $J = 9.0$  Hz, 0.5H), 4.94 (d,  $J = 8.5$  Hz, 0.5H), 3.03-2.94 (m, 1H), 2.07-2.00 (m, 2H), 1.83-1.70 (m, 2H);  $^{13}\text{C}$  NMR (100 MHz,  $\text{CDCl}_3$ ): 193.6, 135.1, 133.7, 131.1, 130.1, 128.8, 128.3, 61.4, 60.9, 38.2, 26.8, 25.0, 21.1, 20.2.

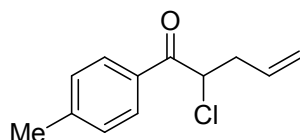

2-chloro-1-p-tolylpent-4-en-1-one (**3o**), colorless oil (41.2 mg);  $^1\text{H}$  NMR (300 MHz,  $\text{CDCl}_3$ )  $\delta$  7.86 (d,  $J = 8.1$  Hz, 2H), 7.30 (d,  $J = 8.1$  Hz, 2H), 6.07-5.94 (m, 1H), 5.22 (dd,  $J = 7.2$  Hz, 6.6 Hz, 1H), 2.98-2.86 (m, 1H), 2.73-2.64 (m, 1H), 2.43 (s, 3H);  $^{13}\text{C}$  NMR (100 MHz,  $\text{CDCl}_3$ ): 192.4, 140.3, 132.4, 128.6, 128.3, 126.4, 119.1, 61.9, 41.3, 29.6; IR (film):  $\nu$  3057, 3021, 2920, 1600, 1580, 1495, 1451  $\text{cm}^{-1}$ ; HRMS (EI) Calcd for  $\text{C}_{12}\text{H}_{13}\text{ClO}$  (M): 208.0655. Found: 208.0670.

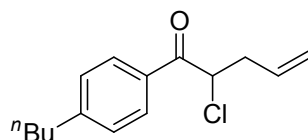

1-(4-butylphenyl)-2-chloropent-4-en-1-one (**3p**), colorless oil (52.5 mg);  $^1\text{H}$  NMR (300 MHz,  $\text{CDCl}_3$ )  $\delta$  7.85 (d,  $J = 8.1$  Hz, 2H), 7.32 (d,  $J = 8.4$  Hz, 2H), 5.85-5.70 (m, 1H), 5.14-5.01 (m, 3H), 2.98-2.86 (m, 1H), 2.90-2.54 (m, 4H), 1.57-1.51 (m, 2H), 1.32-1.26 (m, 2H), 0.85 (t,  $J = 7.2$  Hz, 3H);  $^{13}\text{C}$  NMR (100 MHz,  $\text{CDCl}_3$ ): 192.6, 143.8, 133.9, 133.0, 129.1, 128.9, 118.7, 56.2, 37.7, 35.7, 33.1, 22.3, 13.8; IR (film):  $\nu$  3059, 3020, 2921, 1600, 1583, 1491, 1450  $\text{cm}^{-1}$ ; HRMS (EI) Calcd for  $\text{C}_{15}\text{H}_{19}\text{ClO}$  (M): 250.1124. Found: 250.1133.

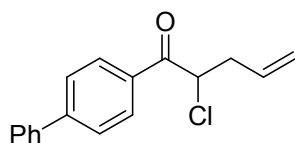

1-(4-phenylphenyl)-2-chloropent-4-en-1-one (**3q**), white solid (48.6mg), m.p. 89-91  $^{\circ}\text{C}$ ;  $^1\text{H}$  NMR (500 MHz,  $\text{CDCl}_3$ )  $\delta$  8.09 (d,  $J = 8.5$  Hz, 2H), 7.72 (d,  $J = 8.5$  Hz, 2H), 7.64 (d,  $J = 8.5$  Hz, 1H), 7.50-7.46 (m, 2H), 7.44-7.41 (m, 1H), 5.93-5.83 (m, 1H),

5.24-5.14 (m, 3H), 2.98-2.92 (m, 1H), 2.82-2.75 (m, 1H);  $^{13}\text{C}$  NMR (100 MHz,  $\text{CDCl}_3$ ): 192.3, 134.4, 132.3, 129.0, 127.7, 127.4, 125.6, 125.0, 124.7, 122.2, 114.7, 55.8, 32.6; IR (film):  $\nu$  3059, 3022, 2924, 1600, 1581, 1490, 1450  $\text{cm}^{-1}$ ; HRMS (EI) Calcd for  $\text{C}_{17}\text{H}_{15}\text{ClO}$  (M): 270.0811. Found: 270.0800.

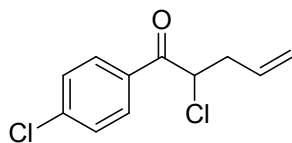

2-chloro-1-(4-chlorophenyl)pent-4-en-1-one (**3r**), white solid (39.8 mg), m.p. 76-78  $^{\circ}\text{C}$ ;  $^1\text{H}$  NMR (300 MHz,  $\text{CDCl}_3$ )  $\delta$  7.92 (d,  $J = 8.1$  Hz, 2H), 7.29 (d,  $J = 8.4$  Hz, 2H), 5.91-5.78 (m, 1H), 5.21-5.08 (m, 3H), 2.97-2.87 (m, 1H), 2.80-2.72 (m, 1H);  $^{13}\text{C}$  NMR (100 MHz,  $\text{CDCl}_3$ ): 192.7, 138.5, 132.4, 129.0, 127.6, 125.0, 118.1, 55.8, 34.4; IR (film):  $\nu$  3050, 3015, 2926, 1600, 1581, 1490, 1459  $\text{cm}^{-1}$ ; HRMS (EI) Calcd for  $\text{C}_{11}\text{H}_{10}\text{Cl}_2\text{O}$  (M): 228.0109. Found: 228.0122.

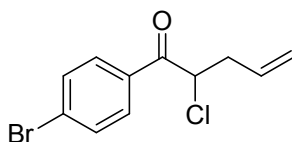

1-(4-bromophenyl)-2-chloropent-4-en-1-one (**3s**), white solid (46.1 mg), m.p. 107-109  $^{\circ}\text{C}$ ;  $^1\text{H}$  NMR (300 MHz,  $\text{CDCl}_3$ )  $\delta$  7.95 (d,  $J = 8.7$  Hz, 2H), 7.47 (d,  $J = 8.4$  Hz, 2H), 5.92-5.79 (m, 1H), 5.23-5.10 (m, 2H), 5.07 (dd,  $J = 7.8$  Hz, 6.3 Hz, 1H), 2.96-2.86 (m, 1H), 2.80-2.71 (m, 1H);  $^{13}\text{C}$  NMR (100 MHz,  $\text{CDCl}_3$ ): 191.8, 134.1, 132.7, 130.3, 129.1, 128.8, 119.1, 56.1, 37.5; IR (film):  $\nu$  3059, 3020, 2921, 1600, 1583, 1491, 1450  $\text{cm}^{-1}$ ; HRMS (EI) Calcd for  $\text{C}_{11}\text{H}_{10}\text{BrClO}$  (M): 271.9604. Found: 271.9620.

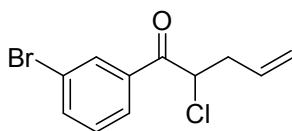

1-(3-bromophenyl)-2-chloropent-4-en-1-one (**3t**), white solid (48.1 mg), m.p. 102-104  $^{\circ}\text{C}$ ;  $^1\text{H}$  NMR (300 MHz,  $\text{CDCl}_3$ )  $\delta$  7.96 (d,  $J = 7.2$  Hz, 1H), 7.81 (s, 1H), 7.50-7.49 (m, 1H), 7.41-7.36 (m, 1H), 6.06-5.94 (m, 1H), 5.18-5.10 (m, 3H), 2.96-2.86 (m, 1H), 2.82-2.71 (m, 1H);  $^{13}\text{C}$  NMR (100 MHz,  $\text{CDCl}_3$ ): 192.9, 138.5, 134.3, 132.6, 131.6, 128.5, 128.0, 123.6, 118.8, 55.8, 36.9; IR (film):  $\nu$  3060, 3022, 2924, 1602, 1580, 1496, 1450  $\text{cm}^{-1}$ ; HRMS (EI) Calcd for  $\text{C}_{11}\text{H}_{10}\text{BrClO}$  (M): 271.9604. Found: 271.9615.

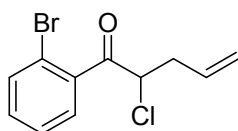

1-(2-bromophenyl)-2-chloropent-4-en-1-one (**3u**), white solid (45.6 mg), m.p. 97-99  $^{\circ}\text{C}$ ;  $^1\text{H}$  NMR (500 MHz,  $\text{CDCl}_3$ )  $\delta$  8.00 (dd,  $J = 8.0$  Hz, 1.0 Hz, 1H), 7.62 (d,  $J = 7.5$  Hz, 1H), 7.51-7.47 (m, 2H), 5.88-5.83 (m, 1H), 5.15-5.07 (m, 3H), 2.94-2.91 (m, 1H), 2.74-2.68 (m, 1H);  $^{13}\text{C}$  NMR (100 MHz,  $\text{CDCl}_3$ ): 191.7, 134.3, 132.2, 128.7, 127.6, 127.5, 125.5, 122.6, 111.4, 55.8, 32.7; IR (film):  $\nu$  3058, 3020, 2920, 1600, 1580,

1495, 1456  $\text{cm}^{-1}$ ; HRMS (EI) Calcd for  $\text{C}_{11}\text{H}_{10}\text{BrClO}$  (M): 271.9604. Found: 271.9624.

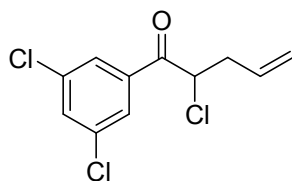

2-chloro-1-(3,5-dichlorophenyl)pent-4-en-1-one (**3v**), white solid (45.0 mg), m.p. 122-124  $^{\circ}\text{C}$ ;  $^1\text{H}$  NMR (500 MHz,  $\text{CDCl}_3$ )  $\delta$  7.85 (s, 2H), 7.59 (s, 1H), 5.87-5.77 (m, 1H), 5.23-5.16 (m, 2H), 4.96 (dd,  $J = 8.5$  Hz, 8.0 Hz, 1H), 2.94-2.81 (m, 1H), 2.78-2.70 (m, 1H);  $^{13}\text{C}$  NMR (100 MHz,  $\text{CDCl}_3$ ): 190.5, 135.8, 133.4, 132.3, 127.3, 119.5, 112.1, 56.1, 37.2, 23.7; IR (film):  $\nu$  3056, 3030, 2928, 1600, 1581, 1493, 1452  $\text{cm}^{-1}$ ; HRMS (EI) Calcd for  $\text{C}_{11}\text{H}_9\text{Cl}_3\text{O}$  (M): 261.9719. Found: 261.9707.

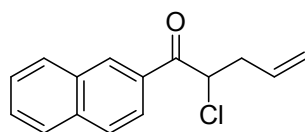

2-chloro-1-(naphthalen-2-yl)pent-4-en-1-one (**3w**), white solid (48.2 mg), m.p. 118-120  $^{\circ}\text{C}$ ;  $^1\text{H}$  NMR (500 MHz,  $\text{CDCl}_3$ )  $\delta$  8.54 (s, 1H), 8.10-7.88 (m, 4H), 7.64-7.50 (m, 2H), 5.96-5.85 (m, 1H), 5.30 (dd,  $J = 8.5$  Hz, 7.5 Hz, 1H), 5.26-5.16 (m, 2H), 3.03-2.98 (m, 1H), 2.86-2.78 (m, 1H);  $^{13}\text{C}$  NMR (100 MHz,  $\text{CDCl}_3$ ): 192.5, 146.5, 139.6, 129.5, 129.0, 128.4, 127.4, 127.3, 119.1, 56.2, 37.7; IR (film):  $\nu$  3059, 3022, 2920, 1600, 1580, 1488, 1460  $\text{cm}^{-1}$ ; HRMS (EI) Calcd for  $\text{C}_{15}\text{H}_{13}\text{ClO}$  (M): 244.0655. Found: 244.0639.

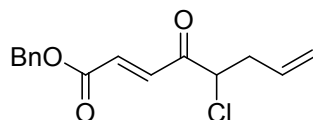

(*E*)-benzyl 5-chloro-4-oxoocta-2,7-dienoate (**3x**), white solid (47.7 mg), m.p. 93-95  $^{\circ}\text{C}$ ;  $^1\text{H}$  NMR (500 MHz,  $\text{CDCl}_3$ )  $\delta$  7.45-7.34 (m, 5H), 6.89 (d,  $J = 15.5$  Hz, 1H), 5.81-5.72 (m, 1H), 5.26 (s, 2H), 5.19-5.15 (m, 2H), 4.41-4.30 (dd,  $J = 8.0$  Hz, 6.5 Hz, 1H), 2.81-2.75 (m, 1H), 2.68-2.63 (m, 1H);  $^{13}\text{C}$  NMR (100 MHz,  $\text{CDCl}_3$ ): 192.1, 164.8, 135.7, 135.1, 132.9, 131.8, 128.7, 128.6, 128.4, 119.6, 67.3, 61.0, 37.3; IR (film):  $\nu$  3065, 3030, 2926, 1600, 1585, 1495, 1462  $\text{cm}^{-1}$ ; HRMS (EI) Calcd for  $\text{C}_{15}\text{H}_{15}\text{ClO}_3$  (M): 278.0710. Found: 278.0701.

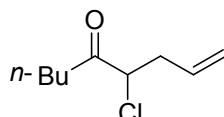

4-chloronon-1-en-5-one (**3y**),<sup>4</sup> colorless oil (32.2 mg);  $^1\text{H}$  NMR (500 MHz,  $\text{CDCl}_3$ )  $\delta$  5.81-5.74 (m, 1H), 5.23-5.15 (m, 2H), 4.35 (dd,  $J = 8.0$  Hz, 7.5 Hz, 1H), 2.80-2.74 (m, 1H), 2.67-2.62 (m, 1H), 2.59-2.51 (m, 2H), 1.45-1.41 (m, 2H), 1.37-1.32 (m, 2H), 1.01-0.97 (t, 3H);  $^{13}\text{C}$  NMR (100 MHz,  $\text{CDCl}_3$ ): 199.7, 133.2, 117.8, 61.7, 35.0, 32.6,



26.4, 21.3, 13.9.

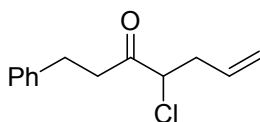

4-chloro-1-phenylhept-6-en-3-one (**3z**),<sup>5</sup> colorless oil (42.7 mg); <sup>1</sup>H NMR (300 MHz, CDCl<sub>3</sub>)  $\delta$  7.30 (d,  $J$  = 6.9 Hz, 2H), 7.22-7.16 (m, 3H), 6.07-5.94 (m, 1H), 5.31-5.24 (m, 1H), 5.17-5.12 (m, 1H), 4.14 (dd,  $J$  = 7.8 Hz, 6.5 Hz, 1H), 3.01-2.91 (m, 2H), 2.87-2.83 (m, 2H), 2.71-2.64 (m, 1H), 2.61-2.50 (m, 1H); <sup>13</sup>C NMR (75 MHz, CDCl<sub>3</sub>): 199.1, 136.5, 131.0, 128.6, 127.9, 126.5, 117.1, 67.0, 39.6, 36.8, 33.5.

Reference:

1. Z.-Y. Han, R. Guo, P.-S. Wang, D.-F. Chen, H. Xiao and L.-Z. Gong, *Tetrahedron Lett.* 2011, **52**, 5963; M. T. Johnson, J. Marthinus Janse van Rensburg, M. Axelsson, M. S. G. Ahlquist and O. F. Wendt, *Chem. Sci.* 2011, **2**, 2373.
2. D. Sud, T. J. Wigglesworth and N. R. Branda, *Angew. Chem. Int. Ed.* 2007, **46**, 8017.
3. K. Shibatomi, K. Kitahara, N. Sasaki, Y. Kawasaki, I. Fujisawa, S. Iwasa, *Nat. Commun.* 2017, **8**, 15600.
4. P. Breuilles and D. Uguen, *Tetrahedron Lett.* 1990, **31**, 357.
5. A. Kohda, K. Ueda and T. Sato, *J. Org. Chem.* 1981, **46**, 509.
6. Y.-Y. Jing, C.-G. Daniliuc and A. Studer, *Org. Lett.* 2014, **16**, 4932.

Copies of  $^1\text{H}$  and  $^{13}\text{C}$  NMR Spectra

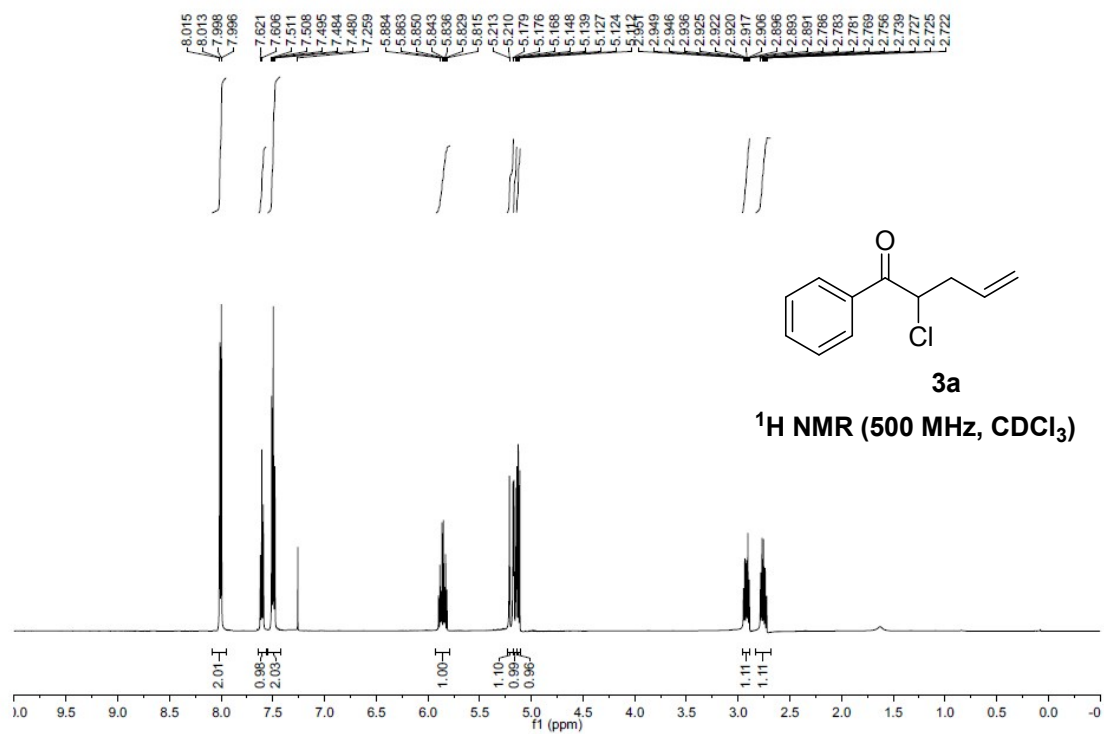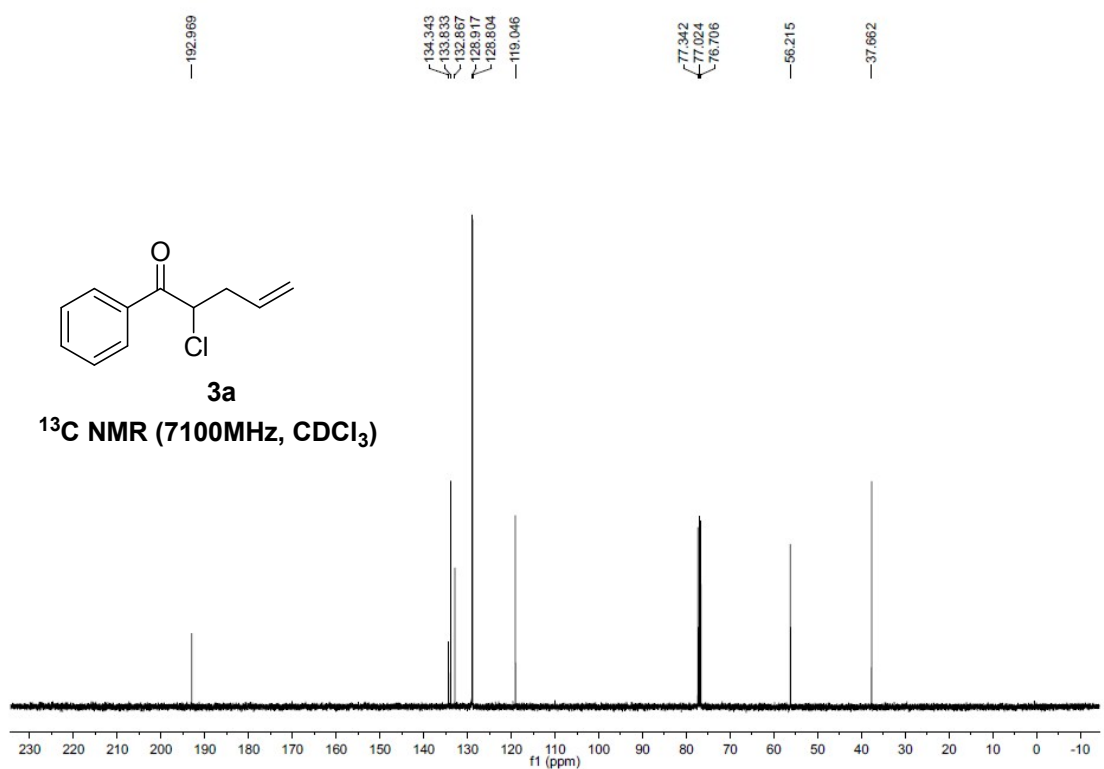

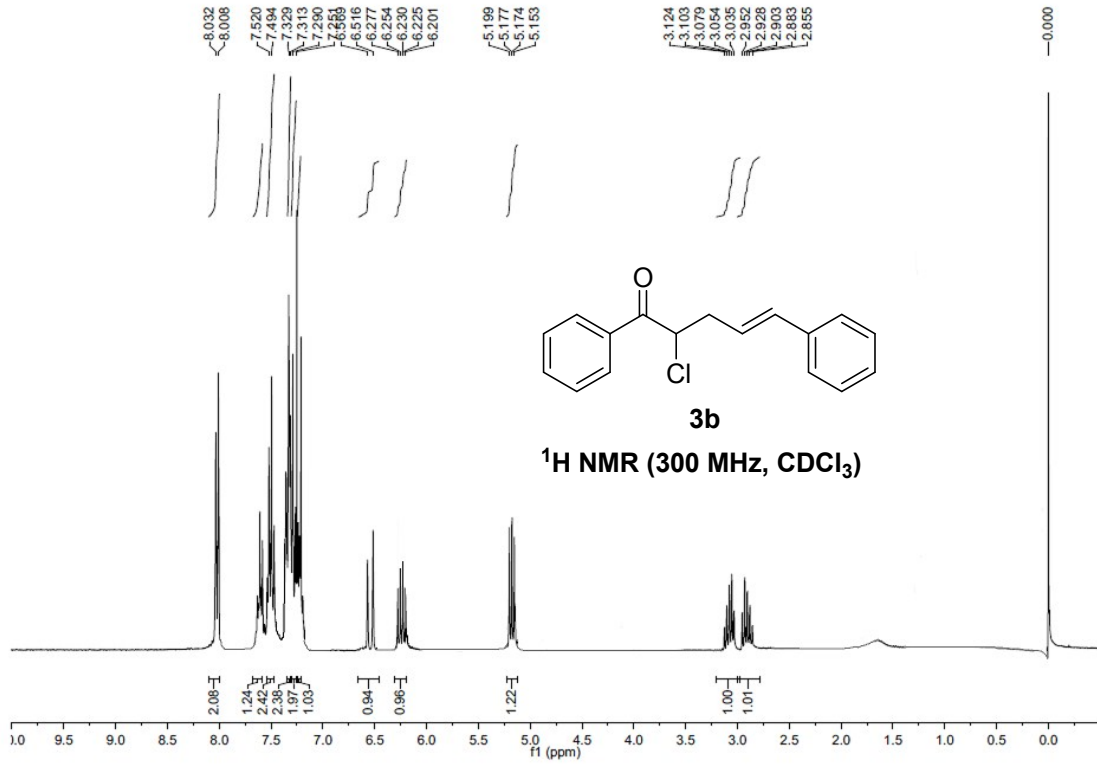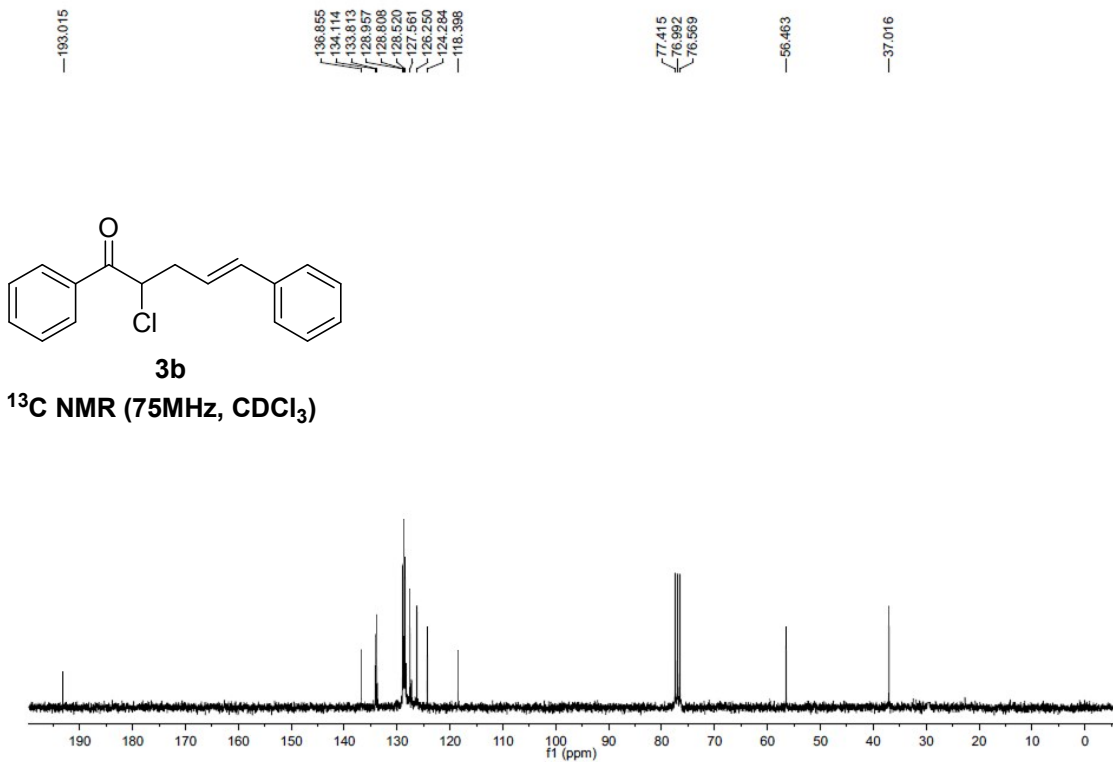

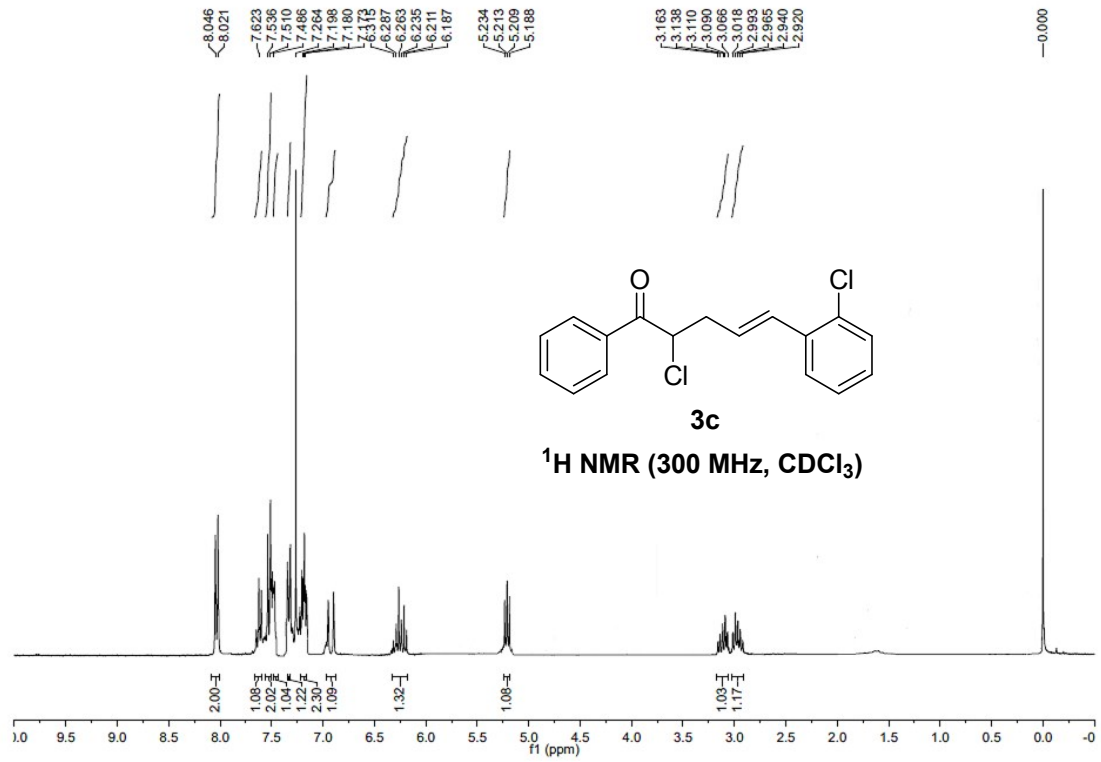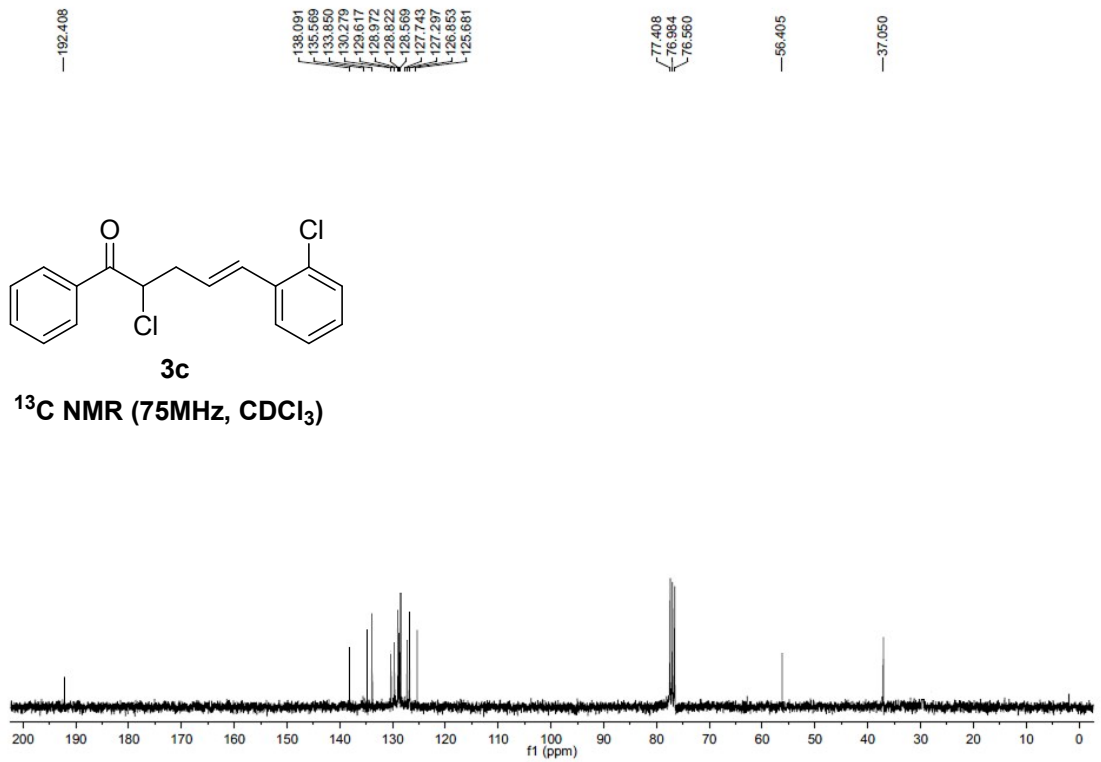

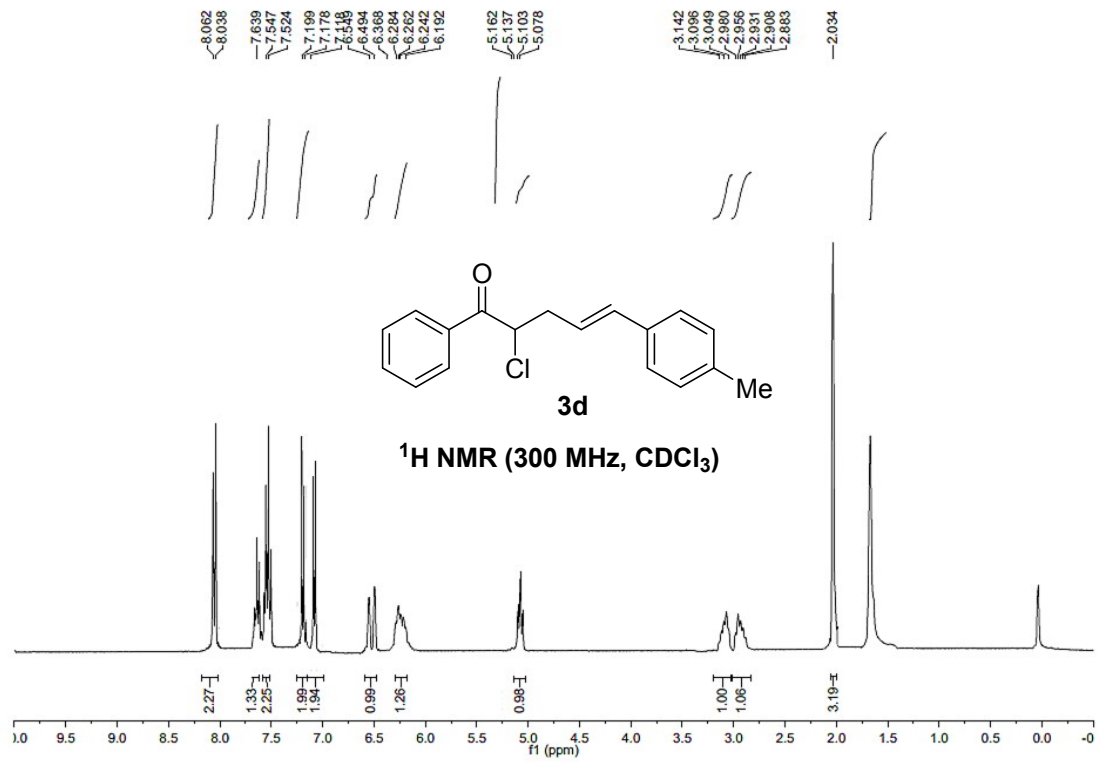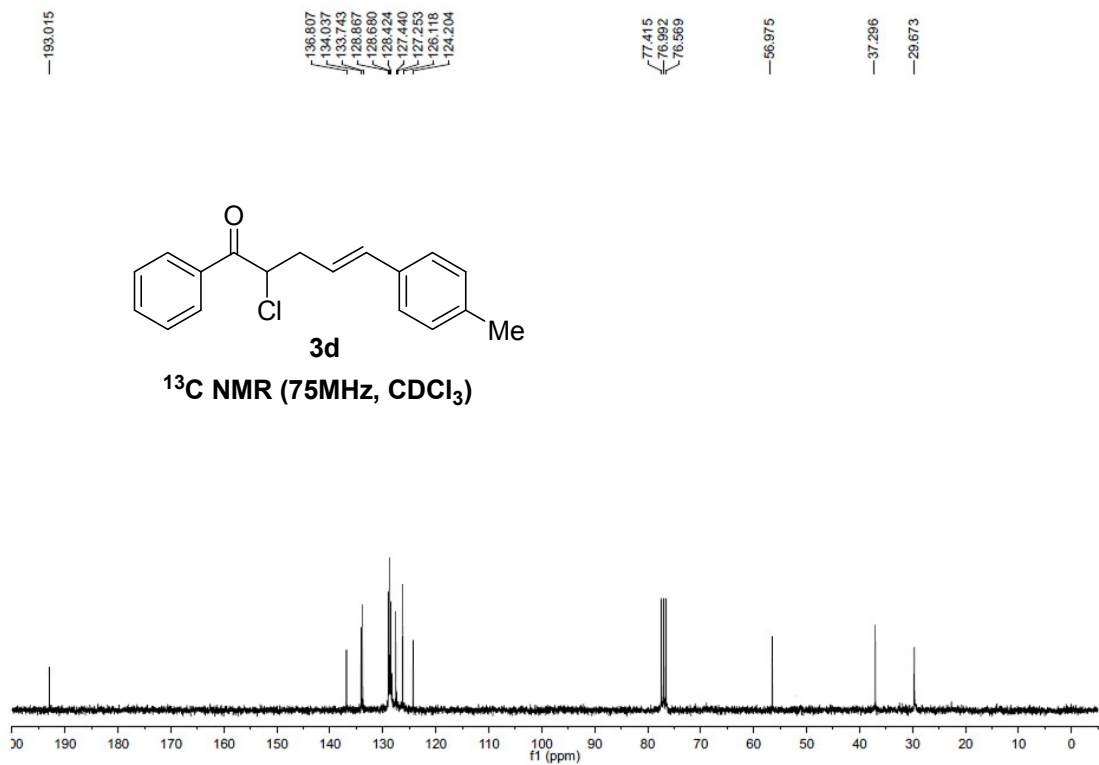

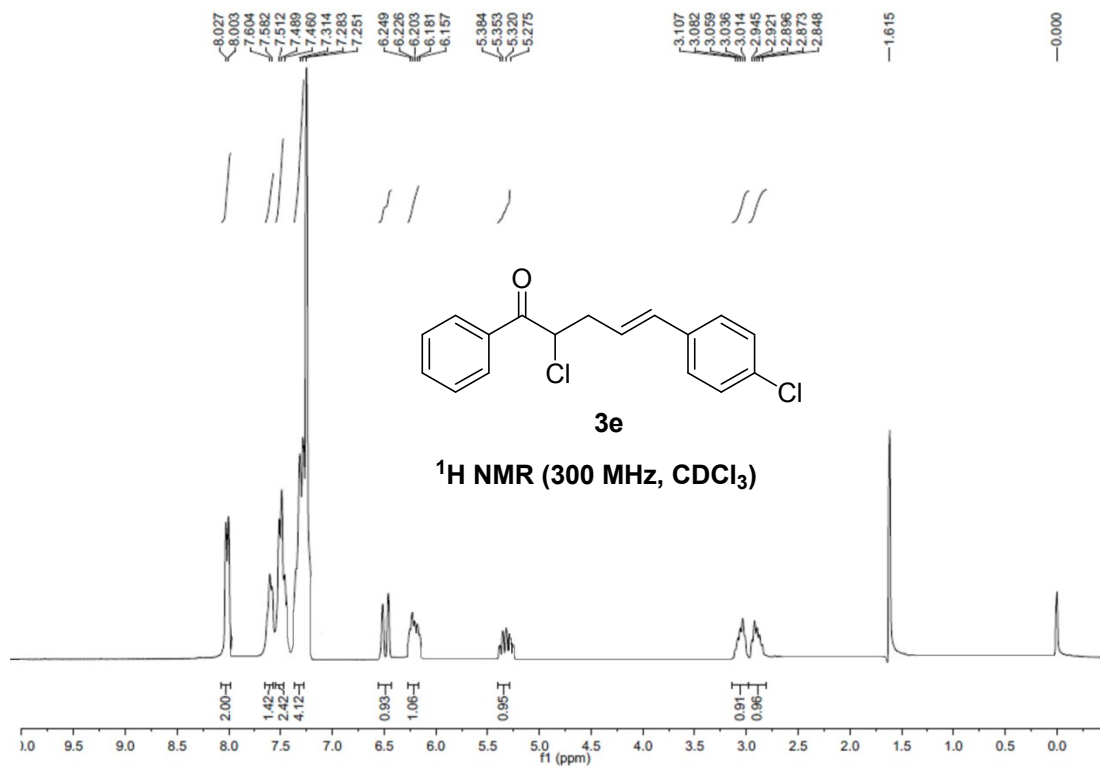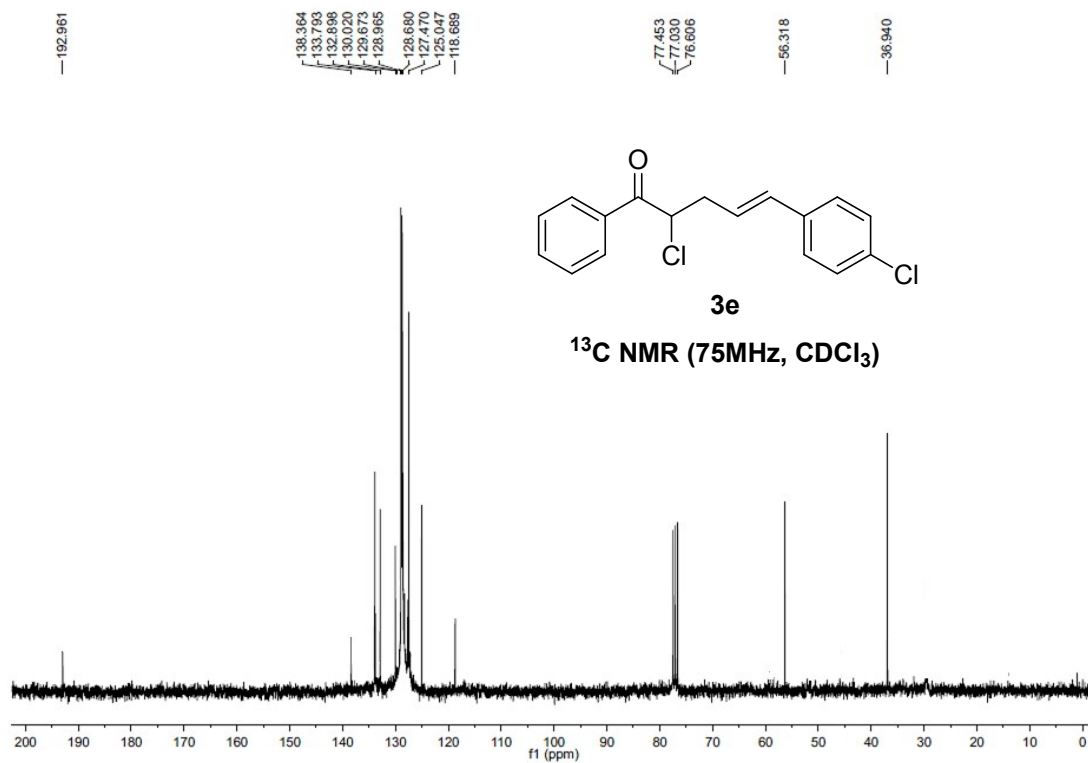

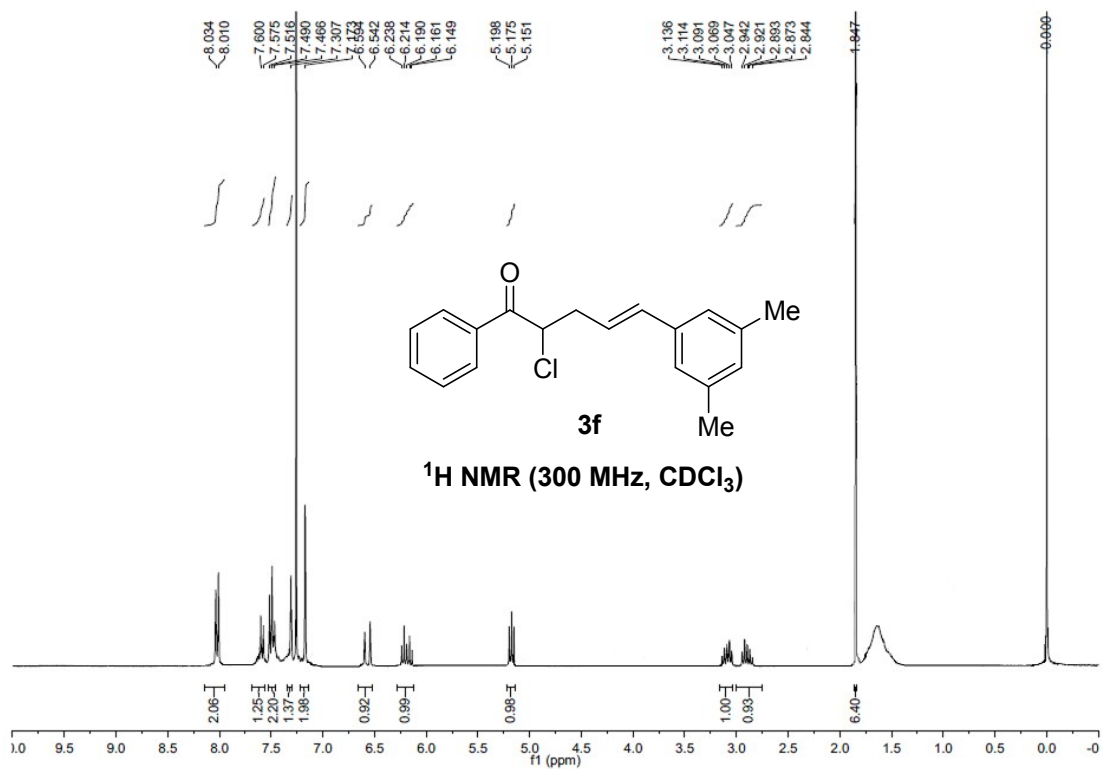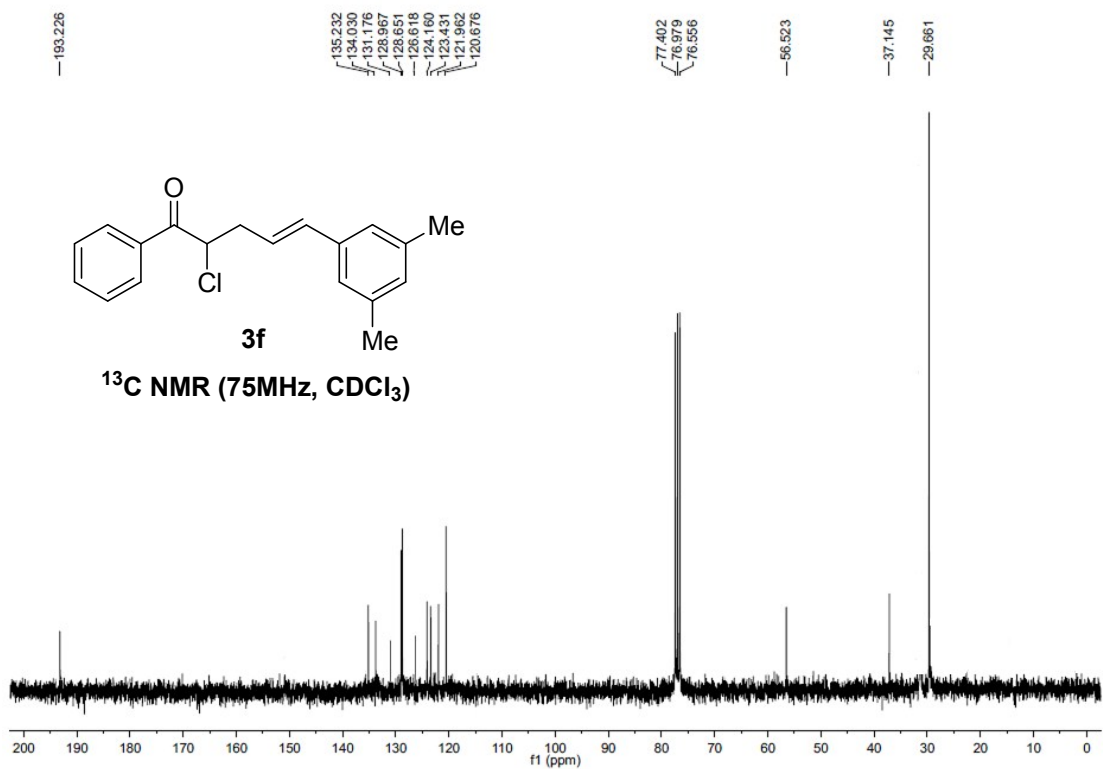

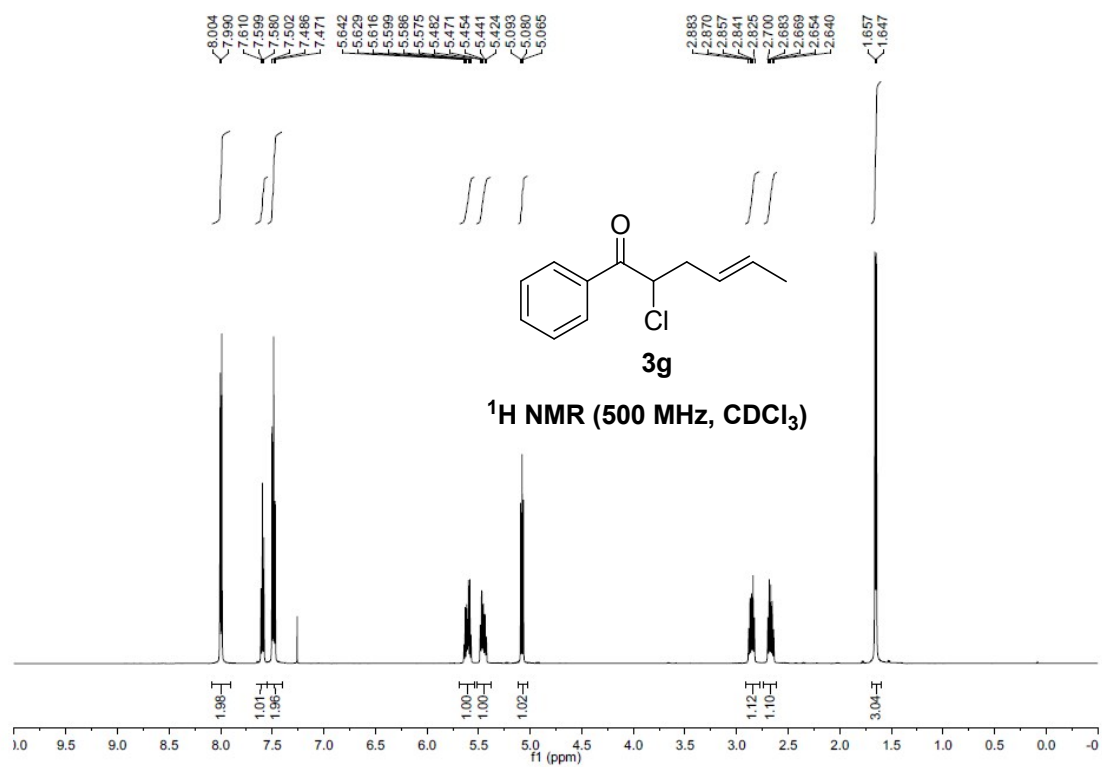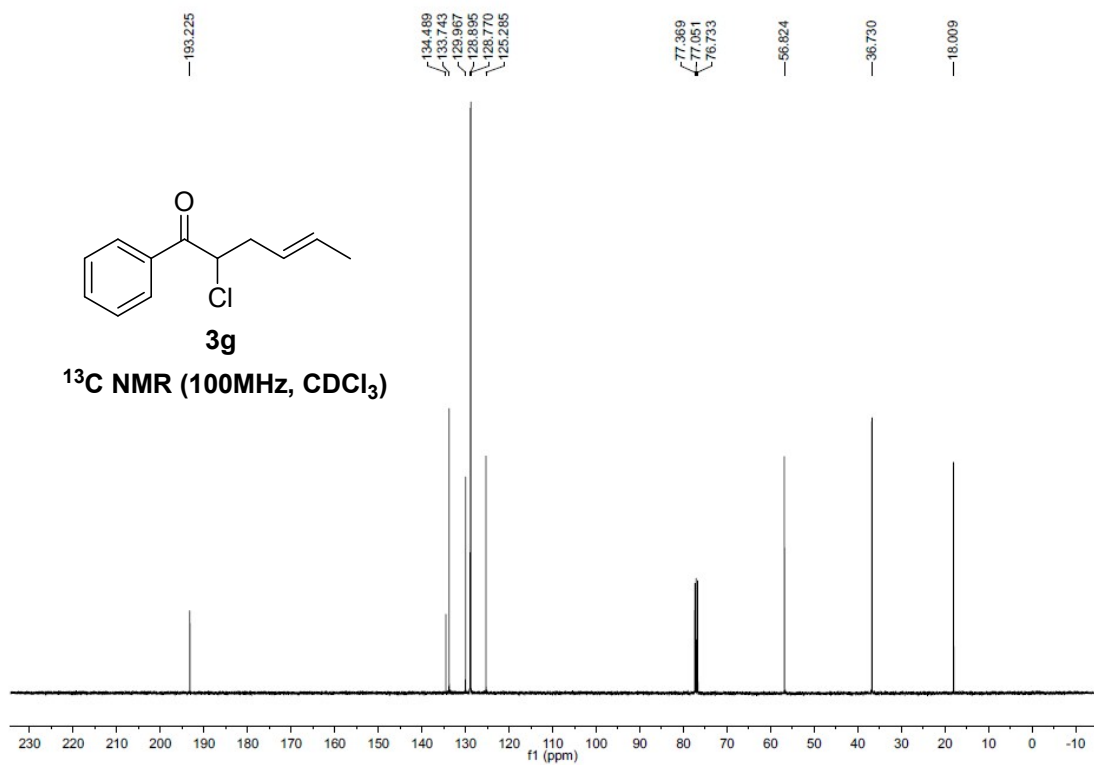



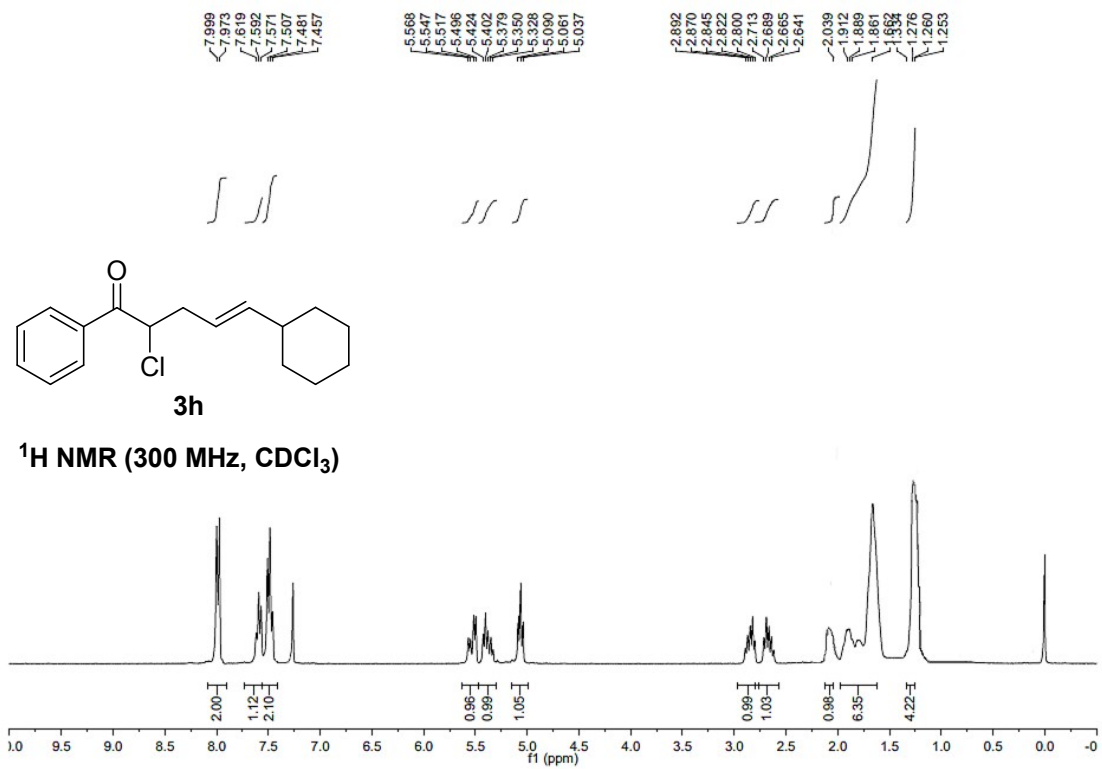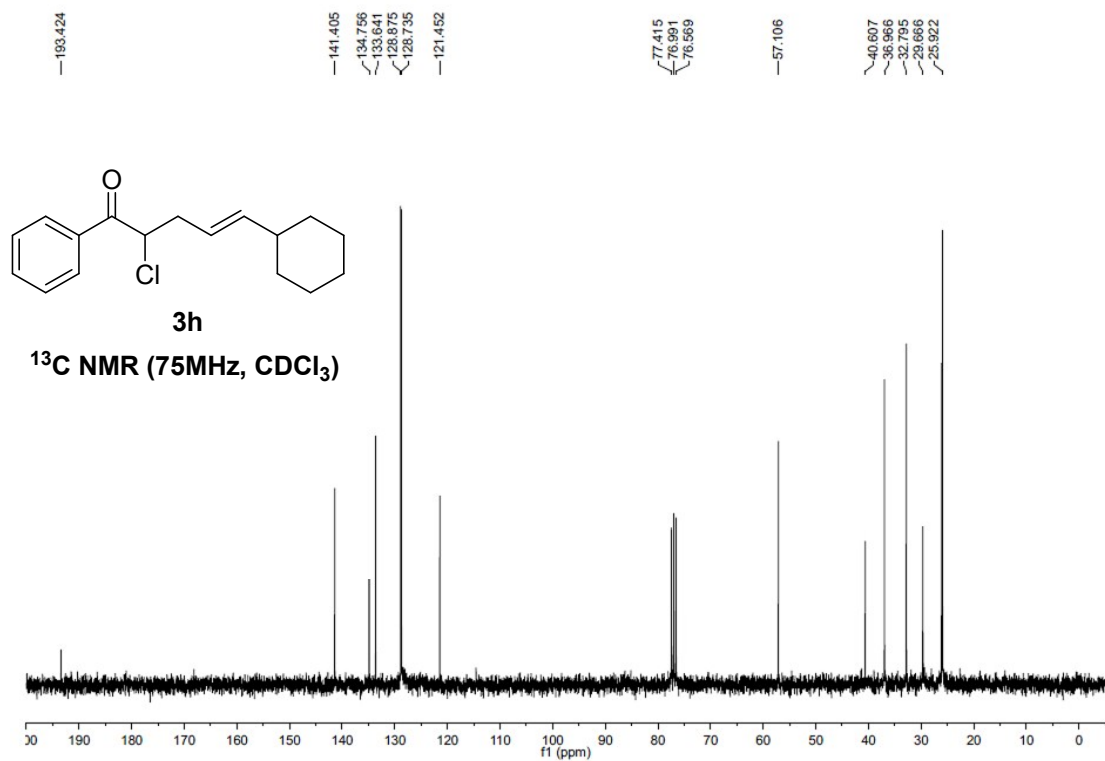

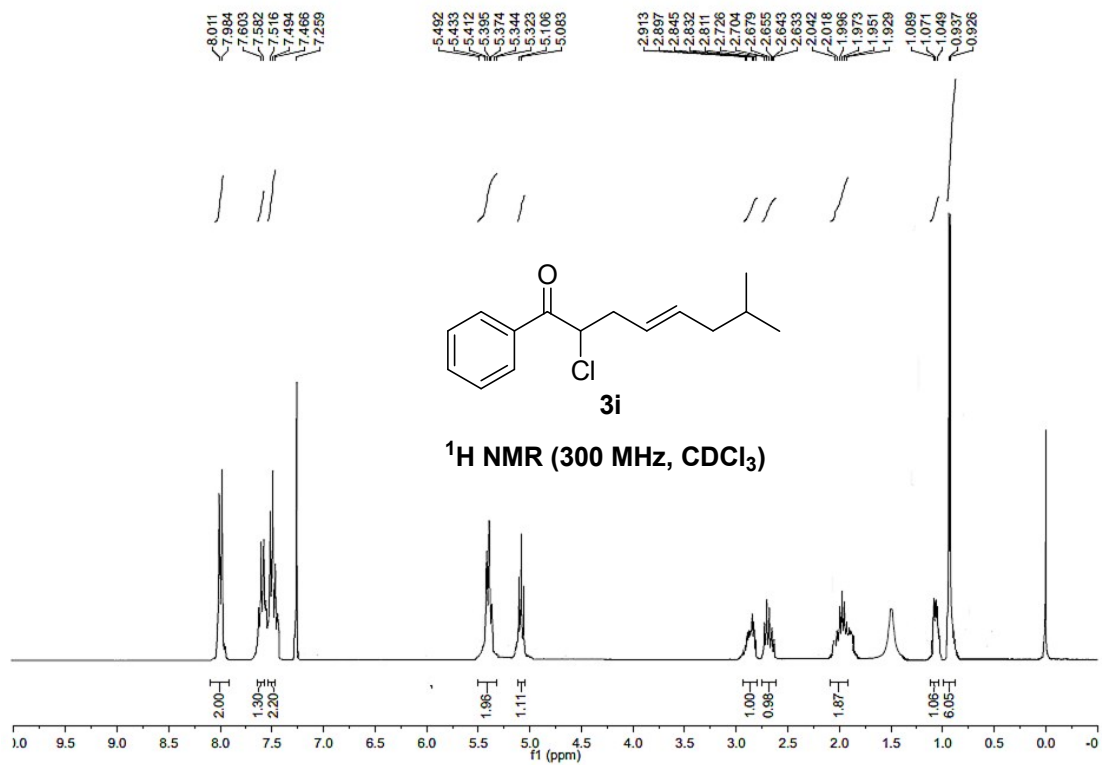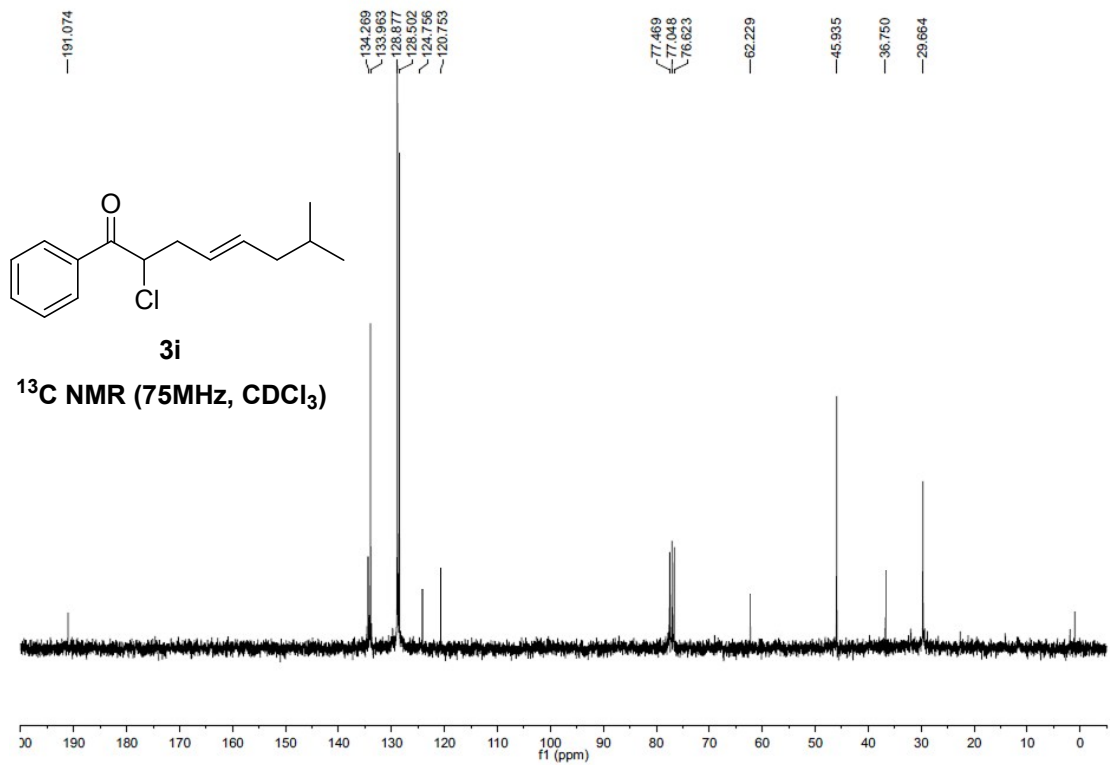

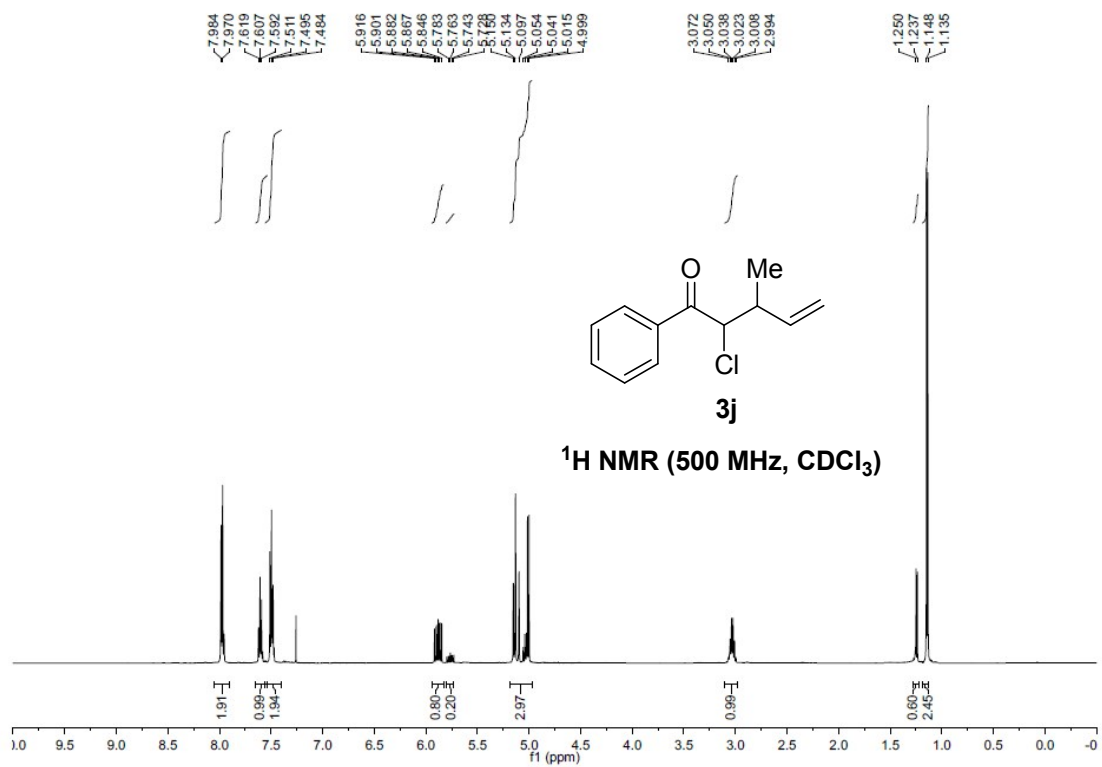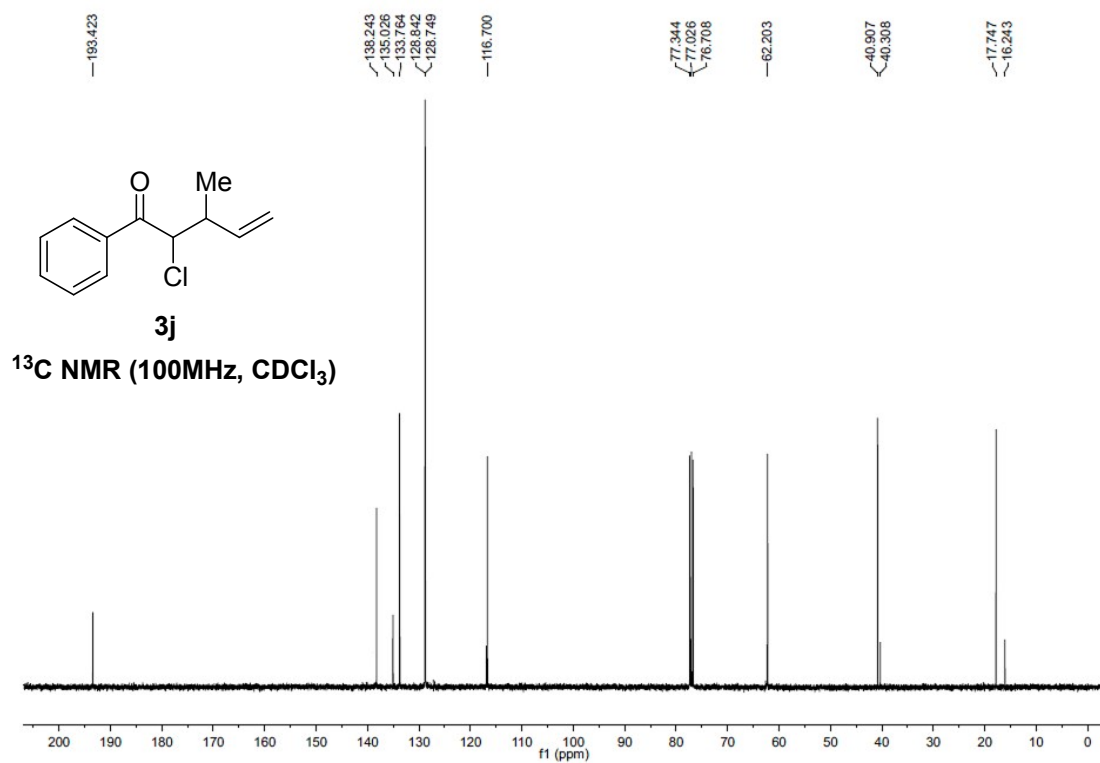

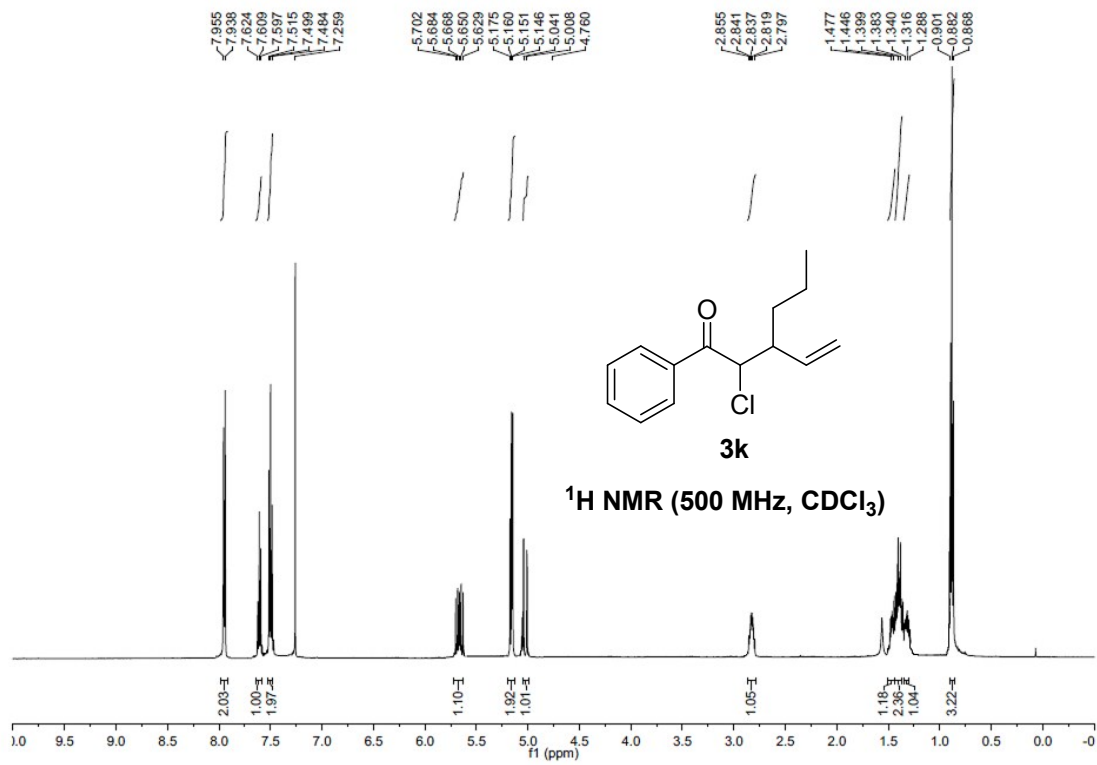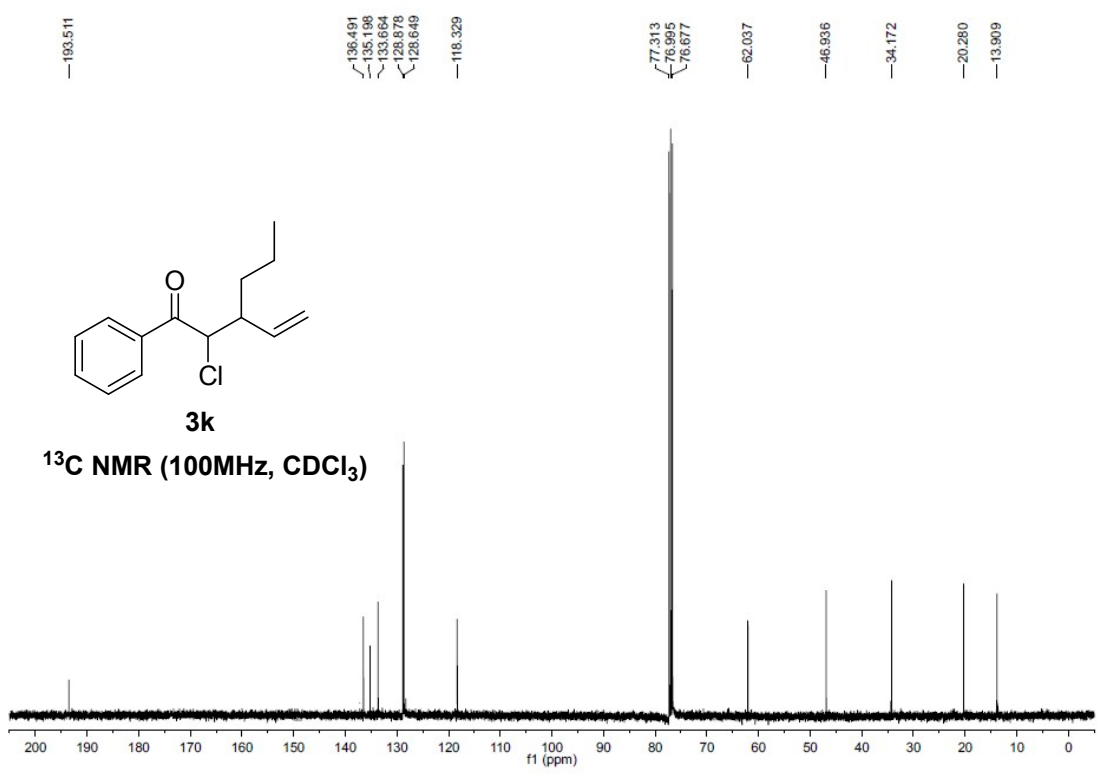

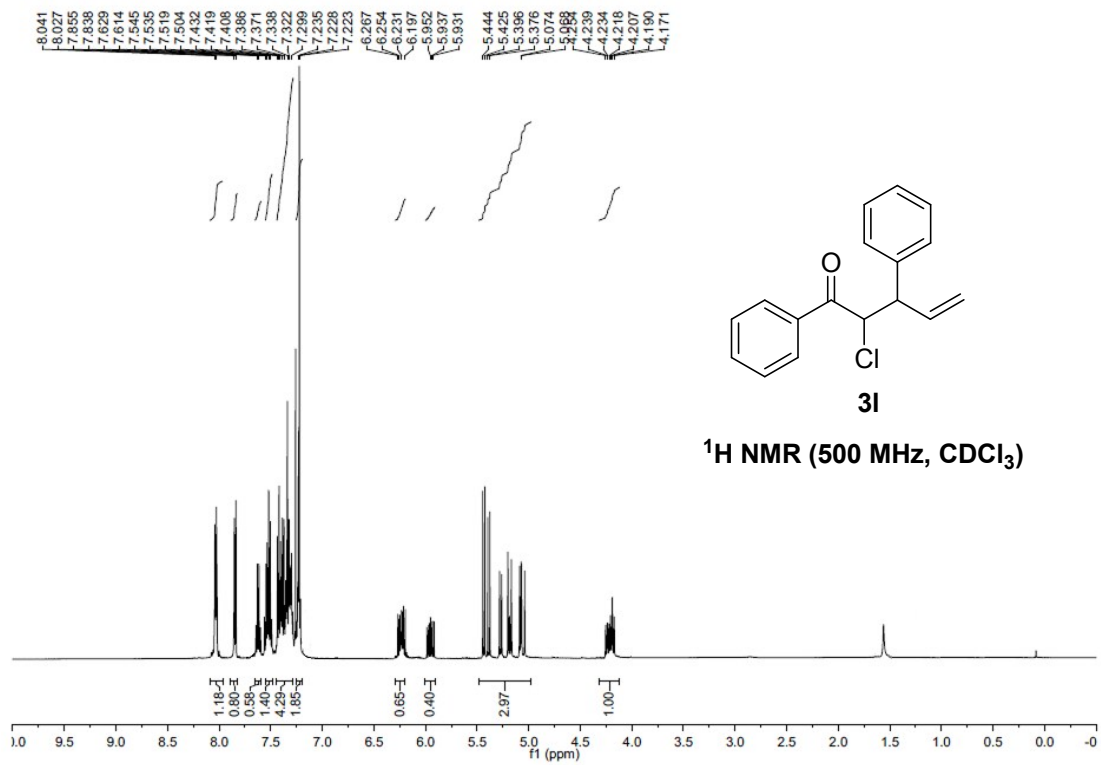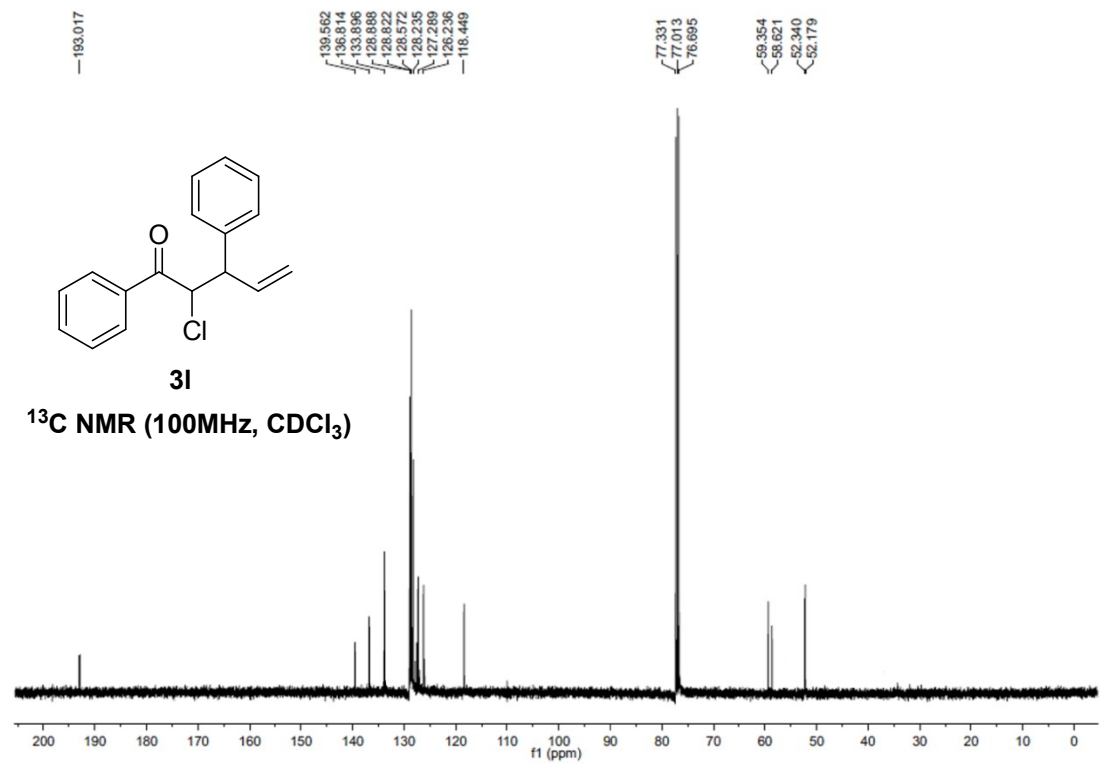

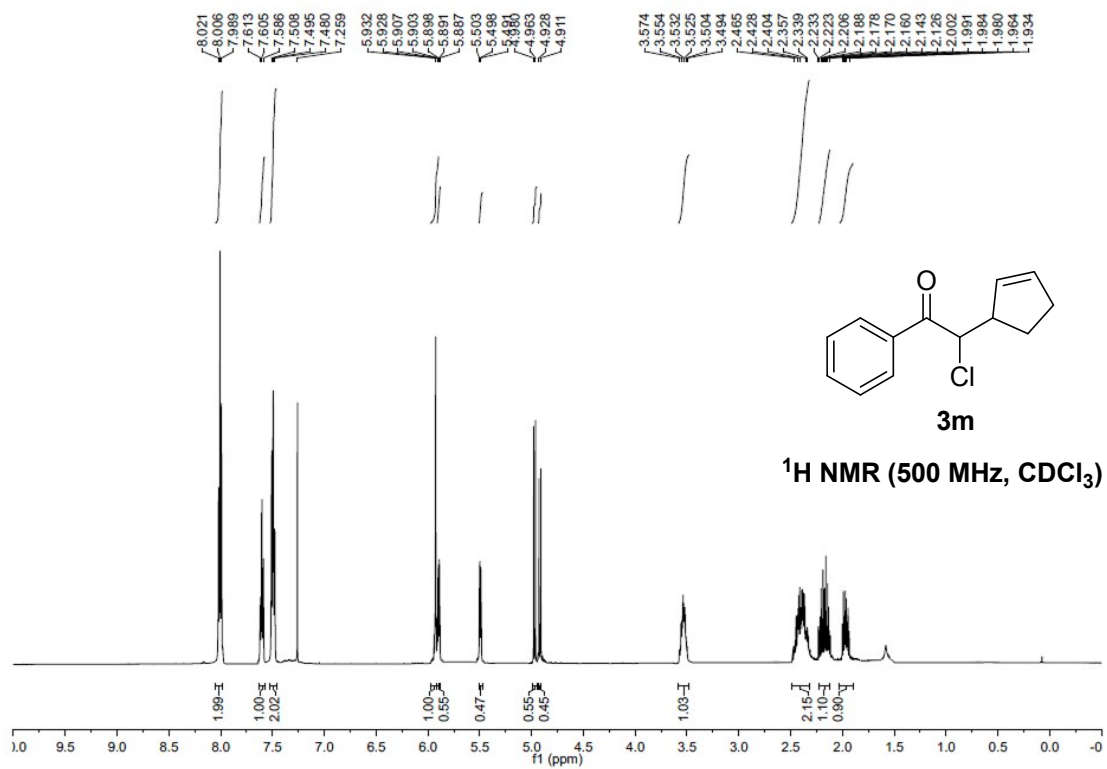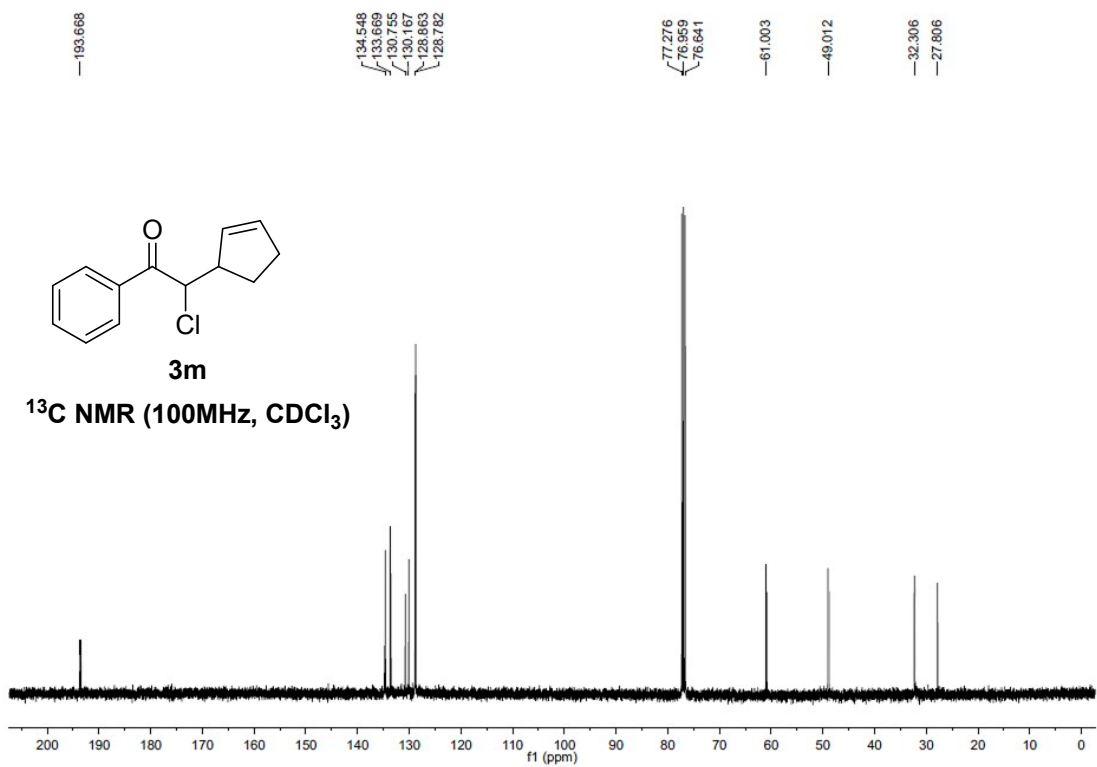

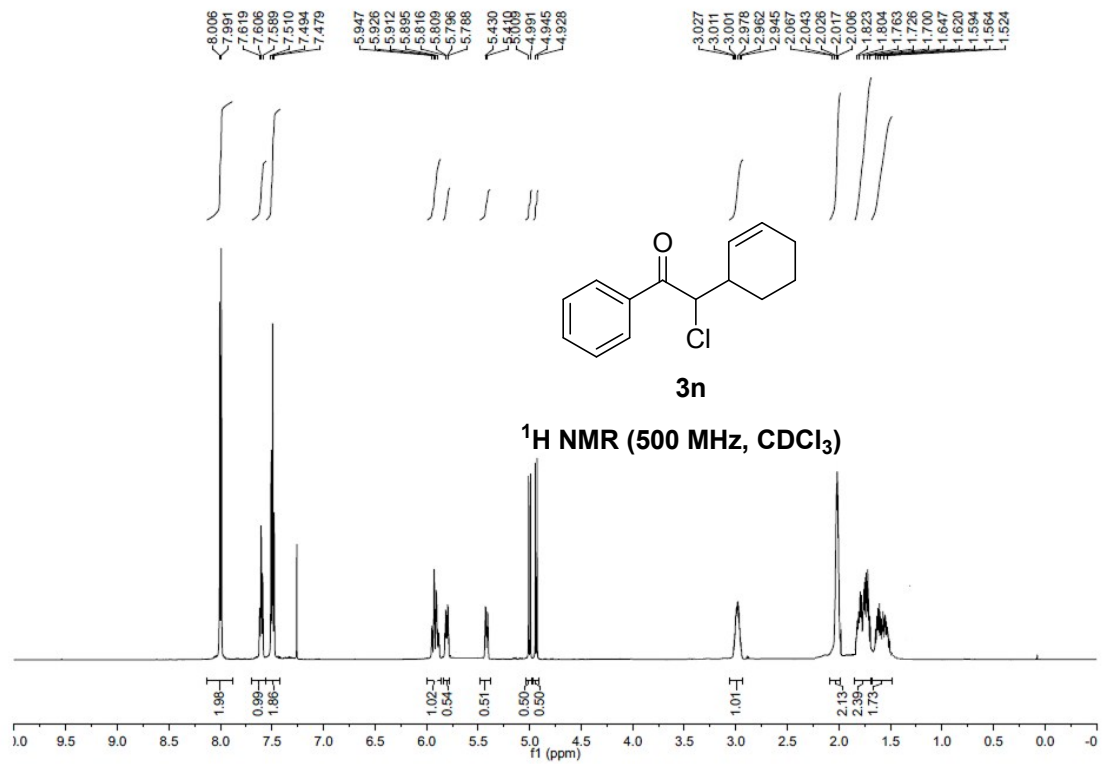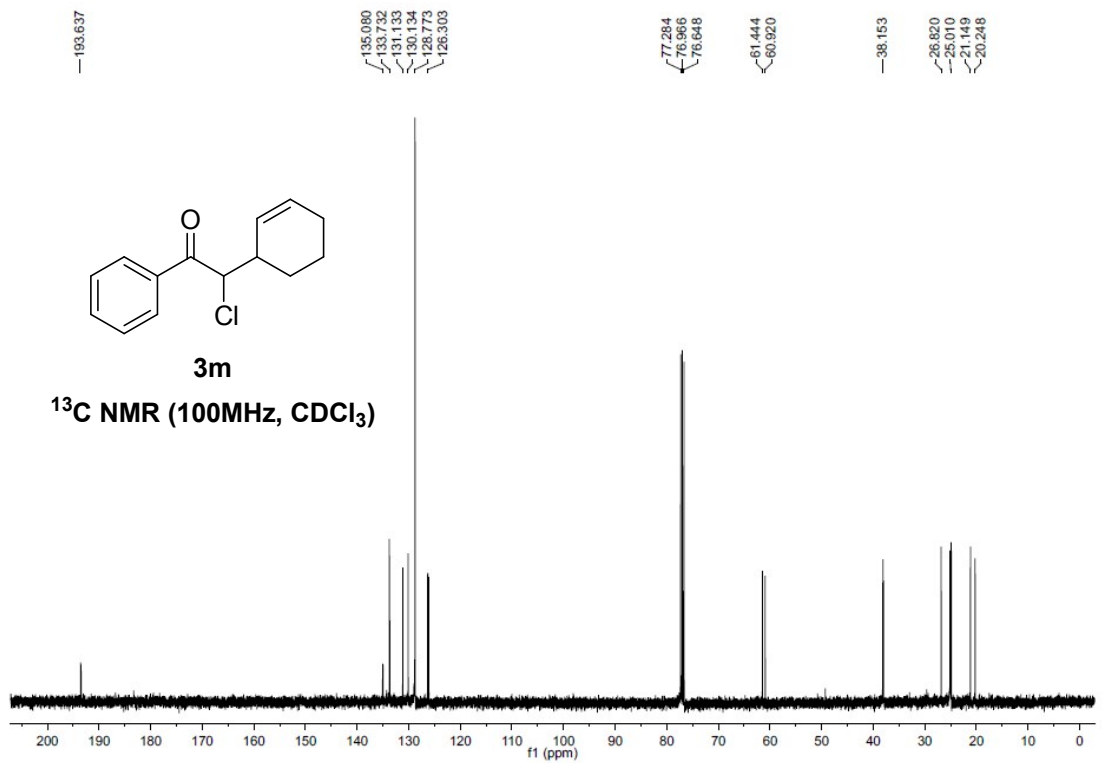

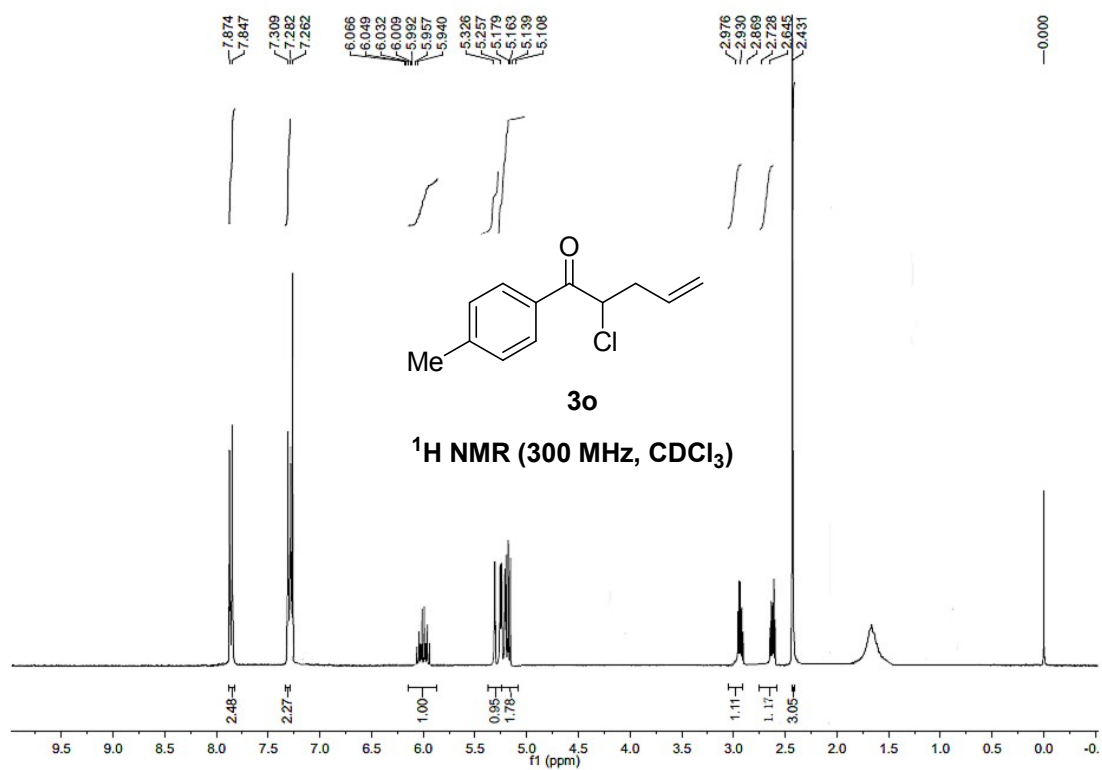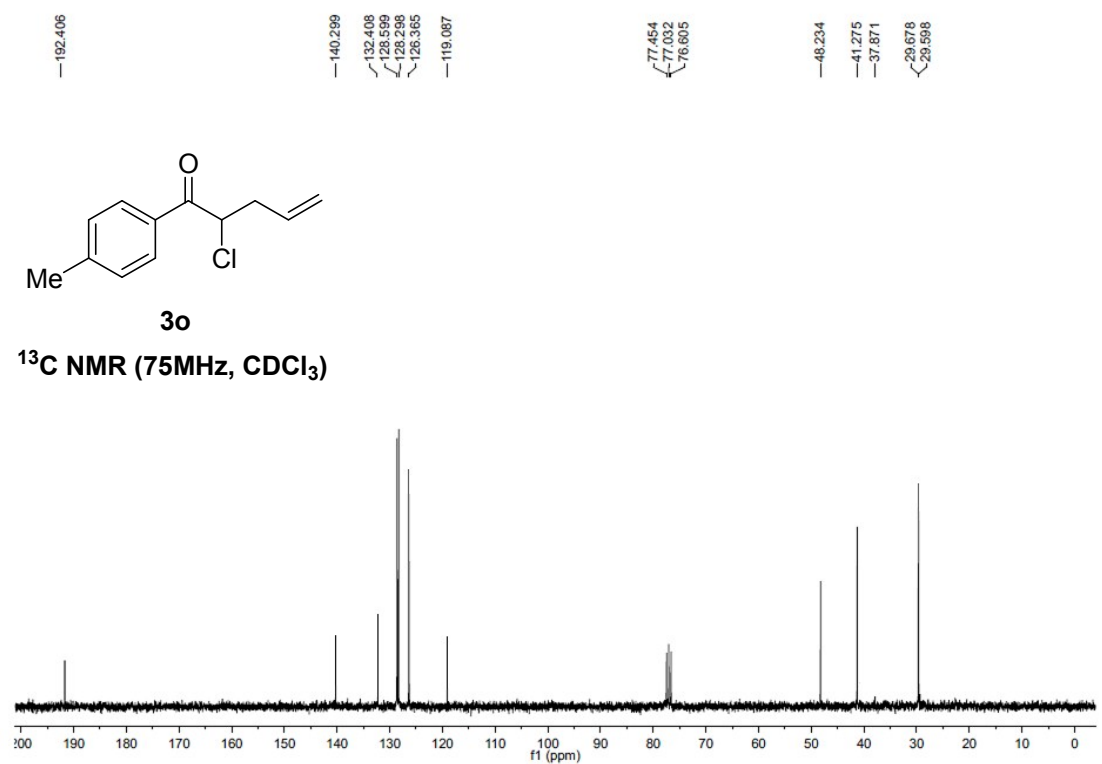



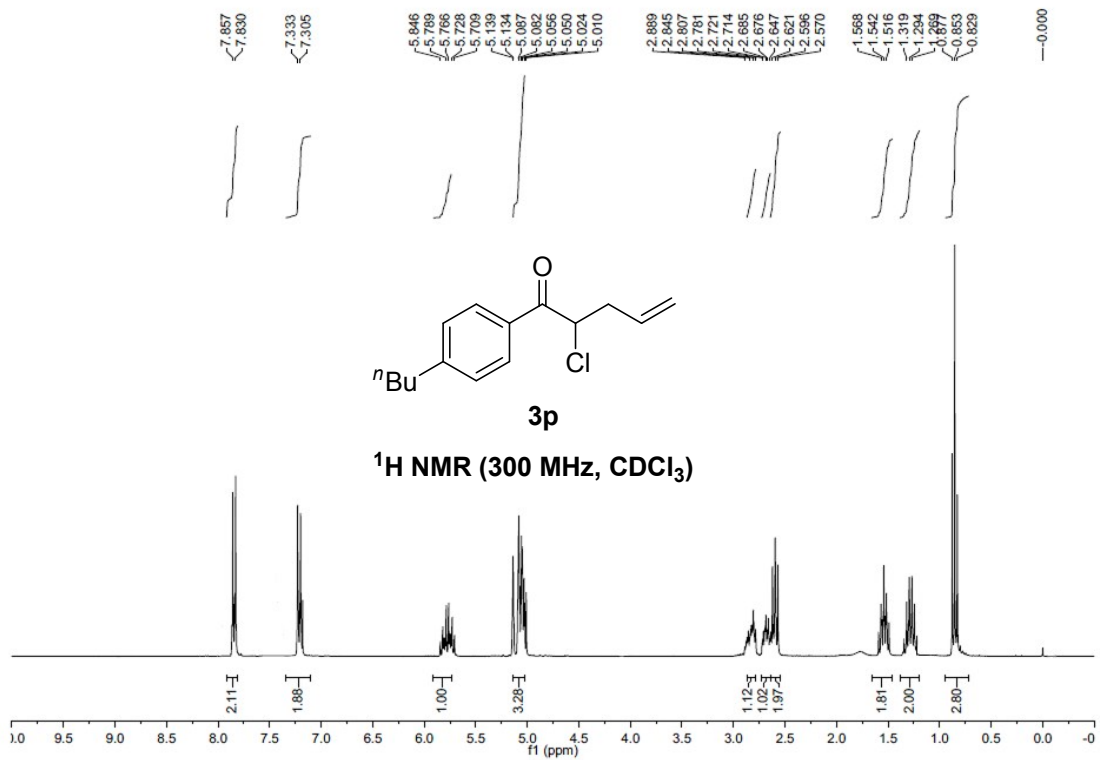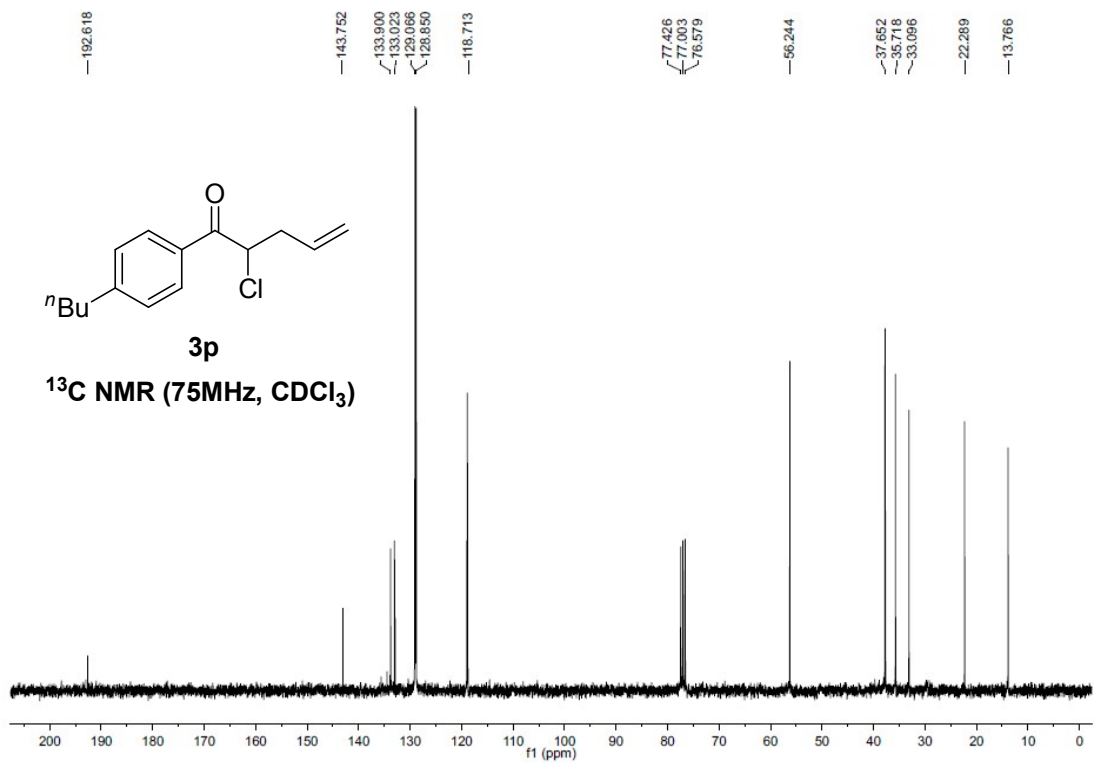

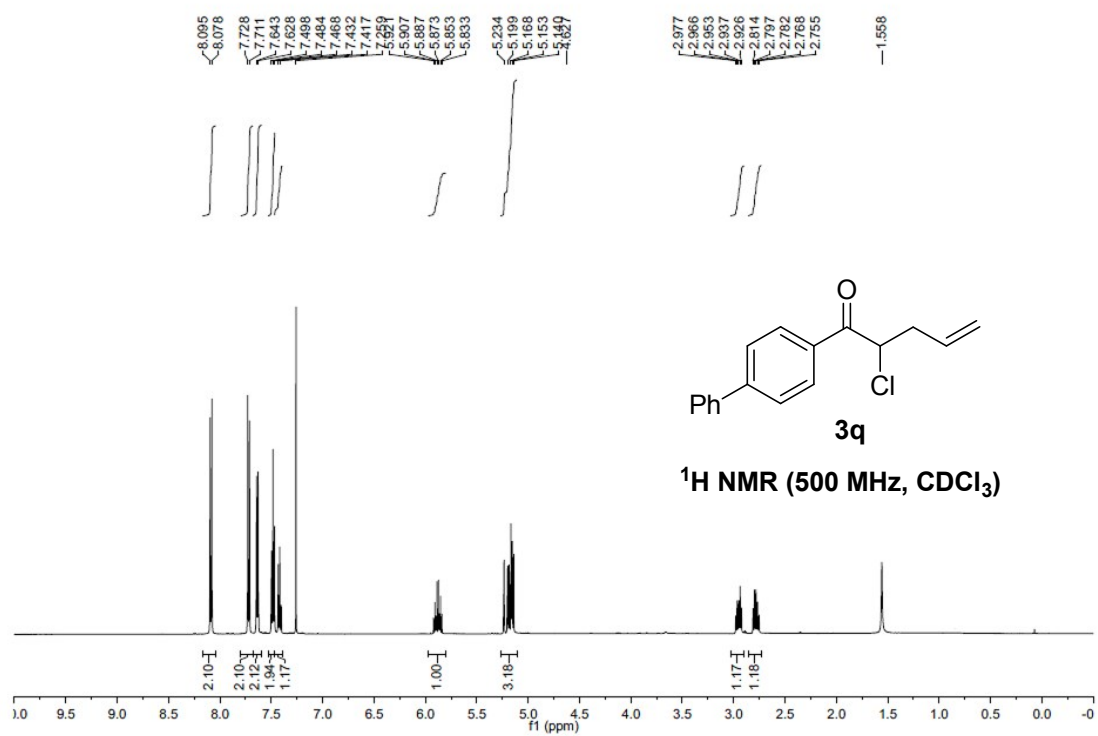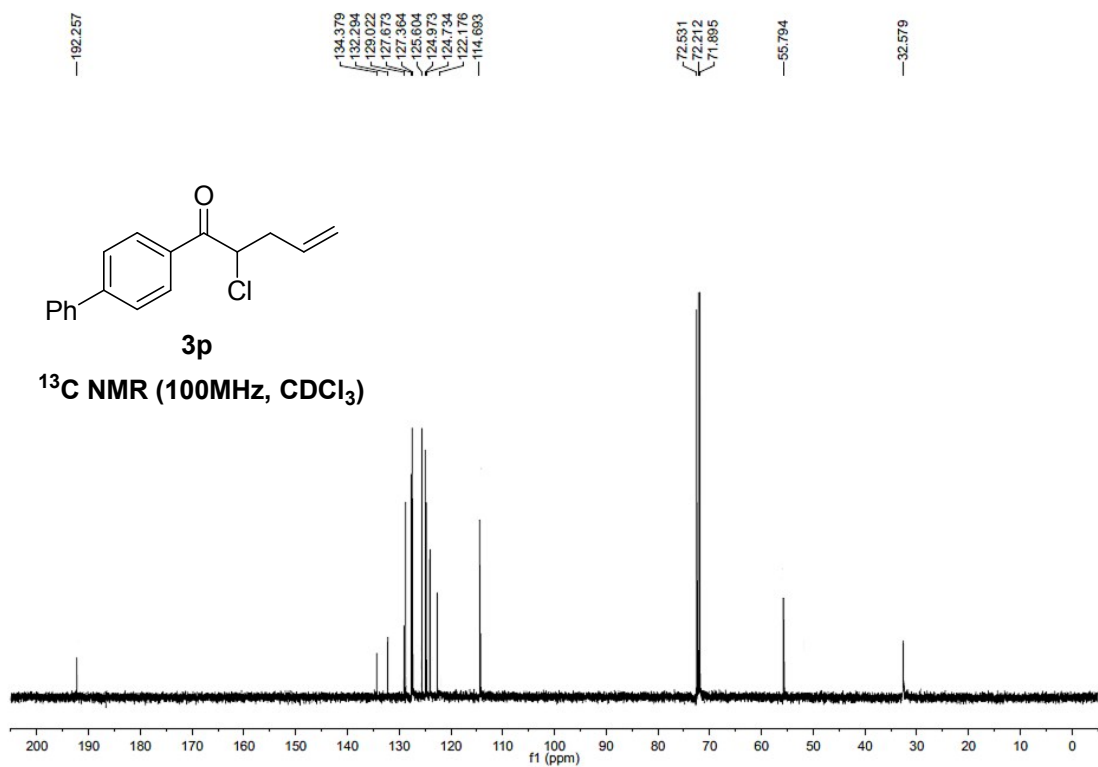

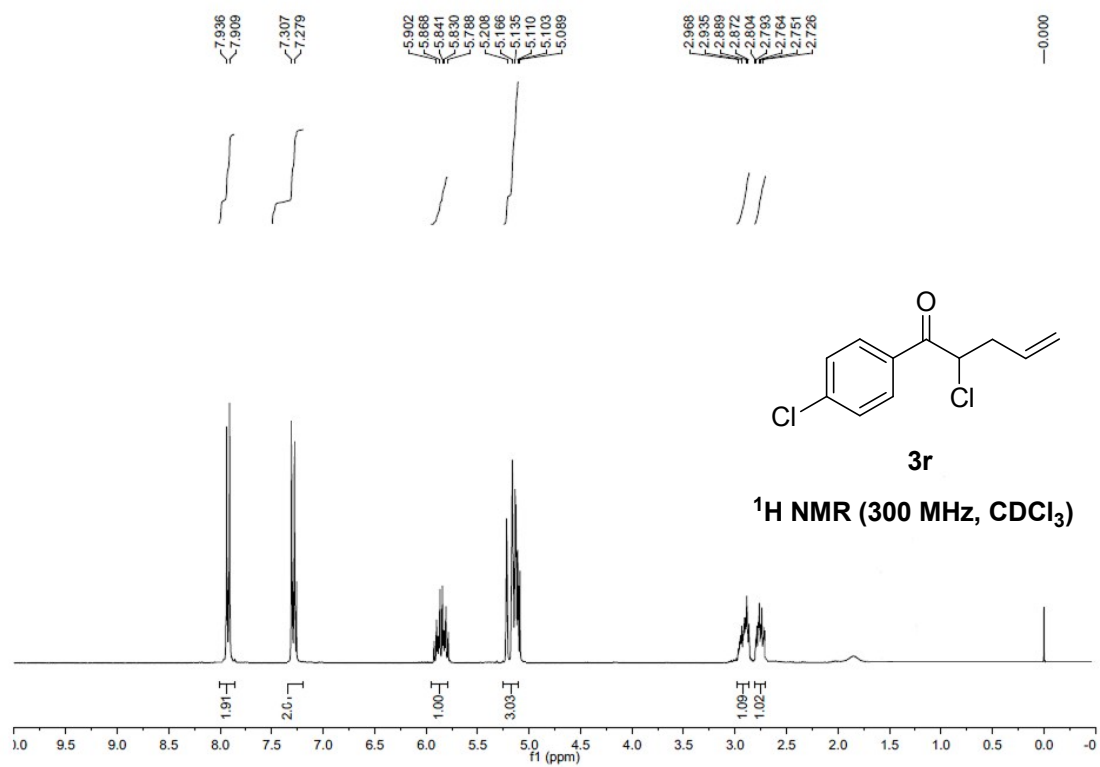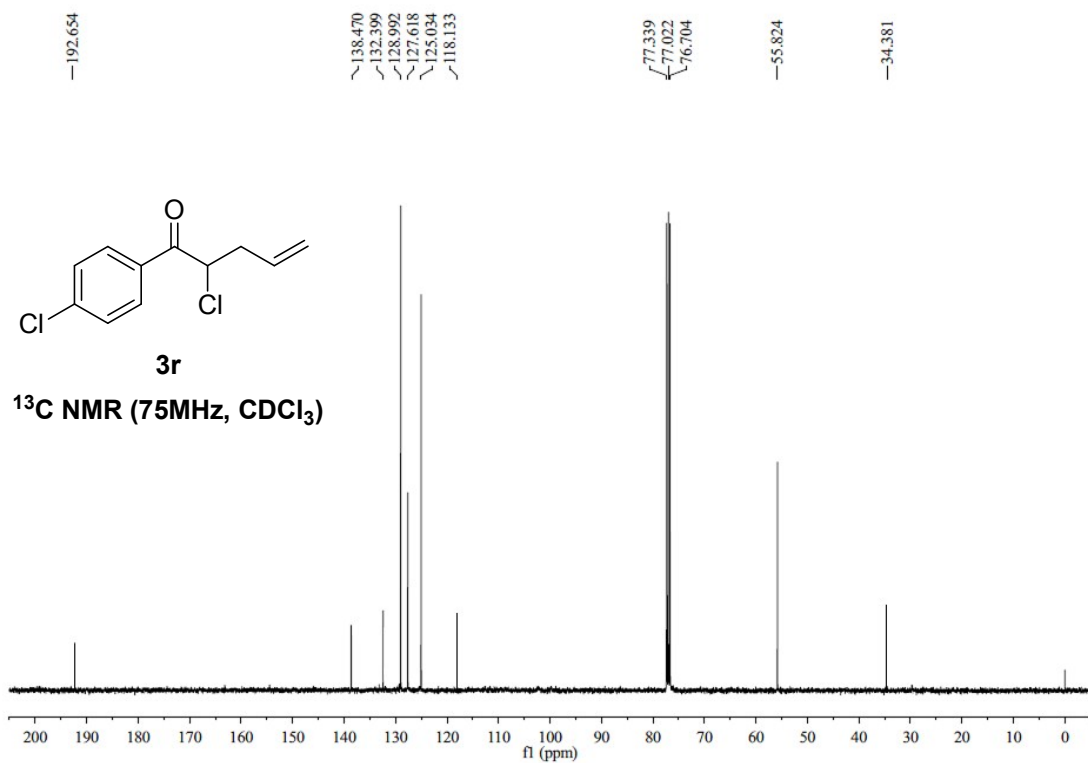

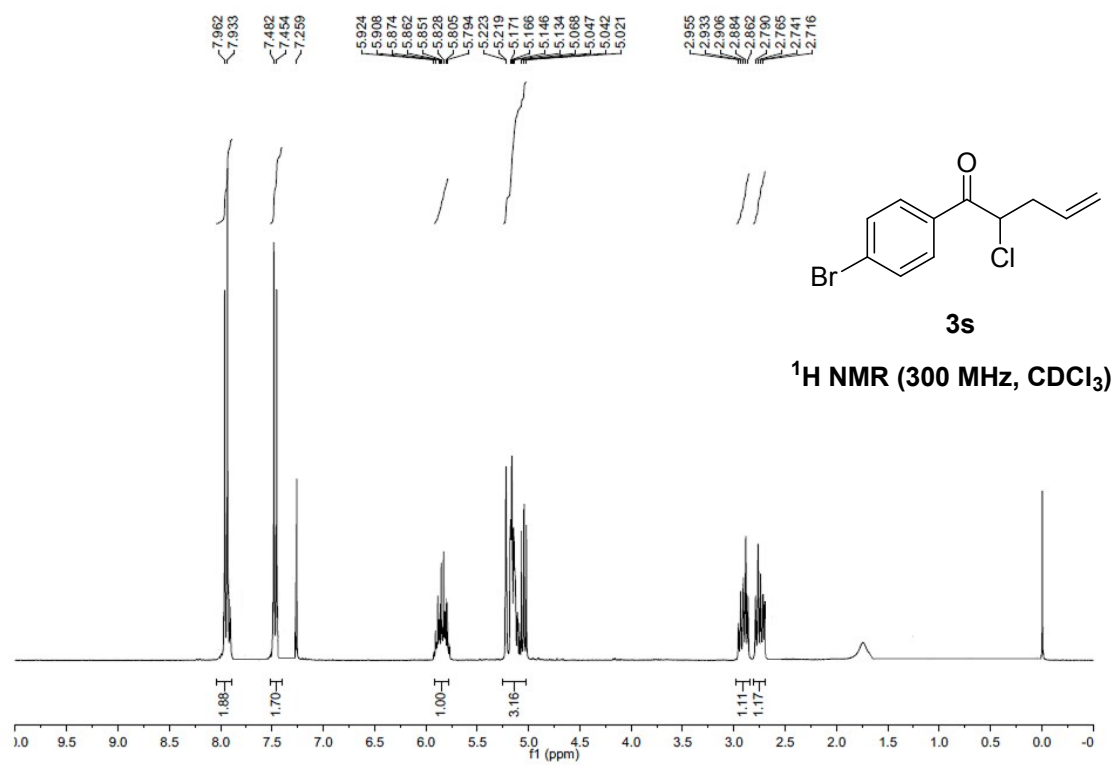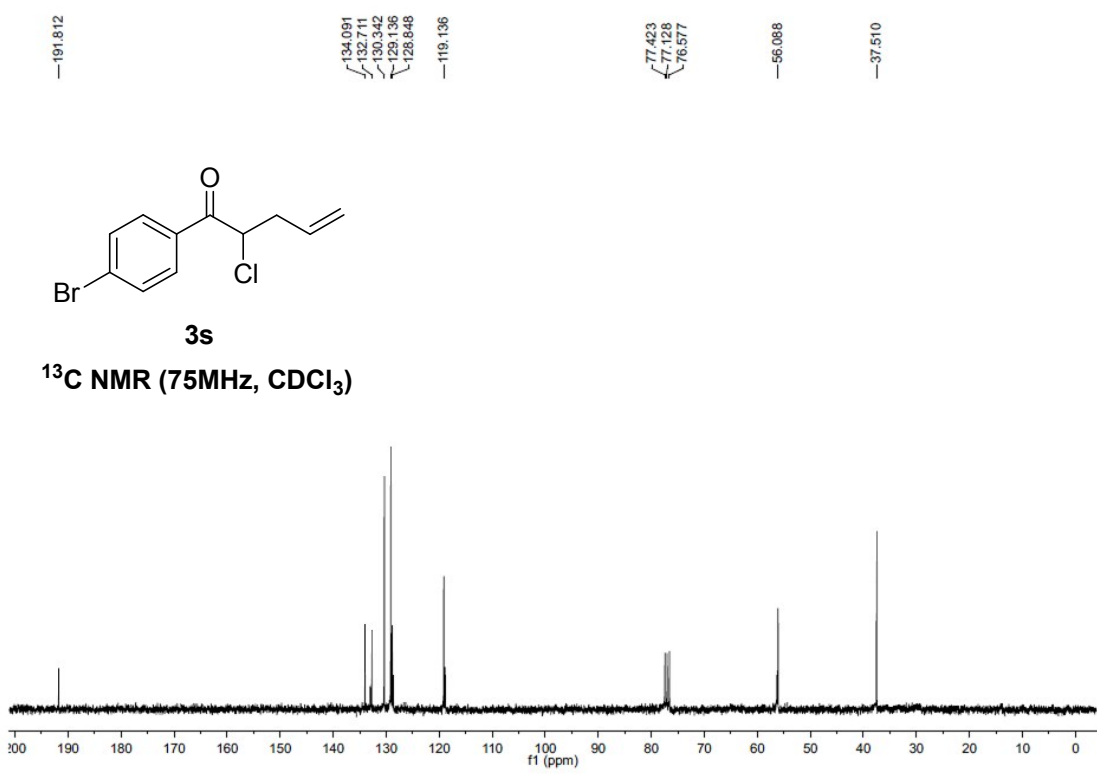

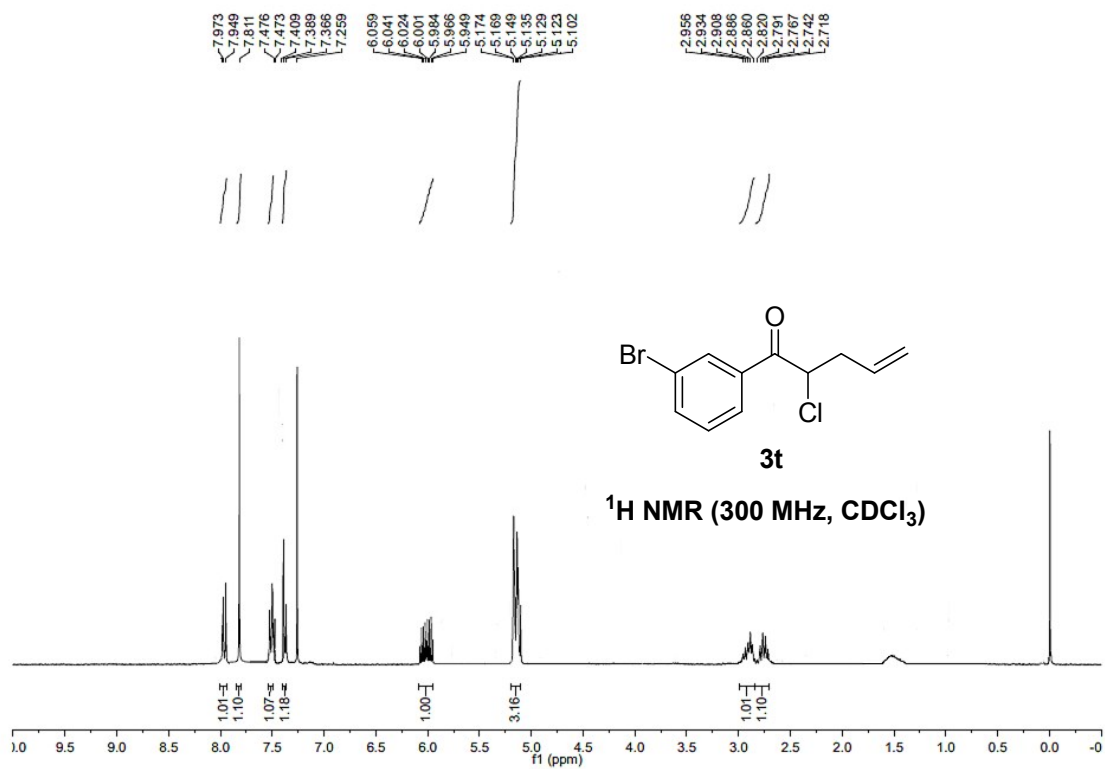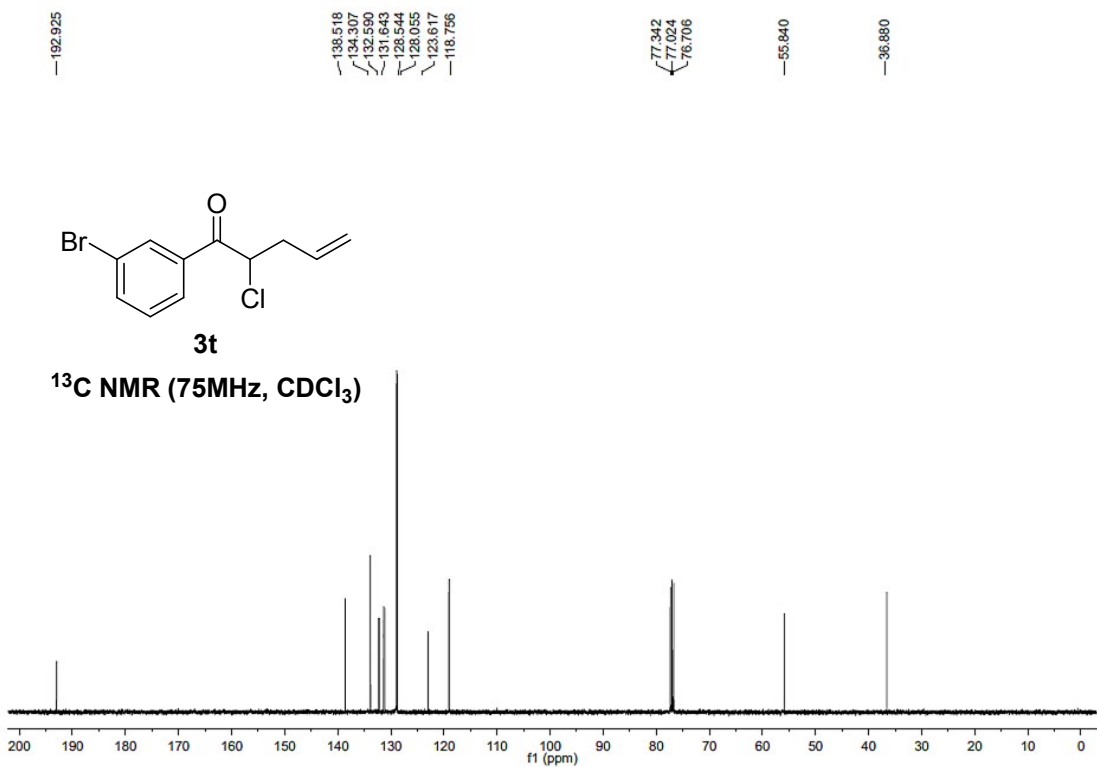

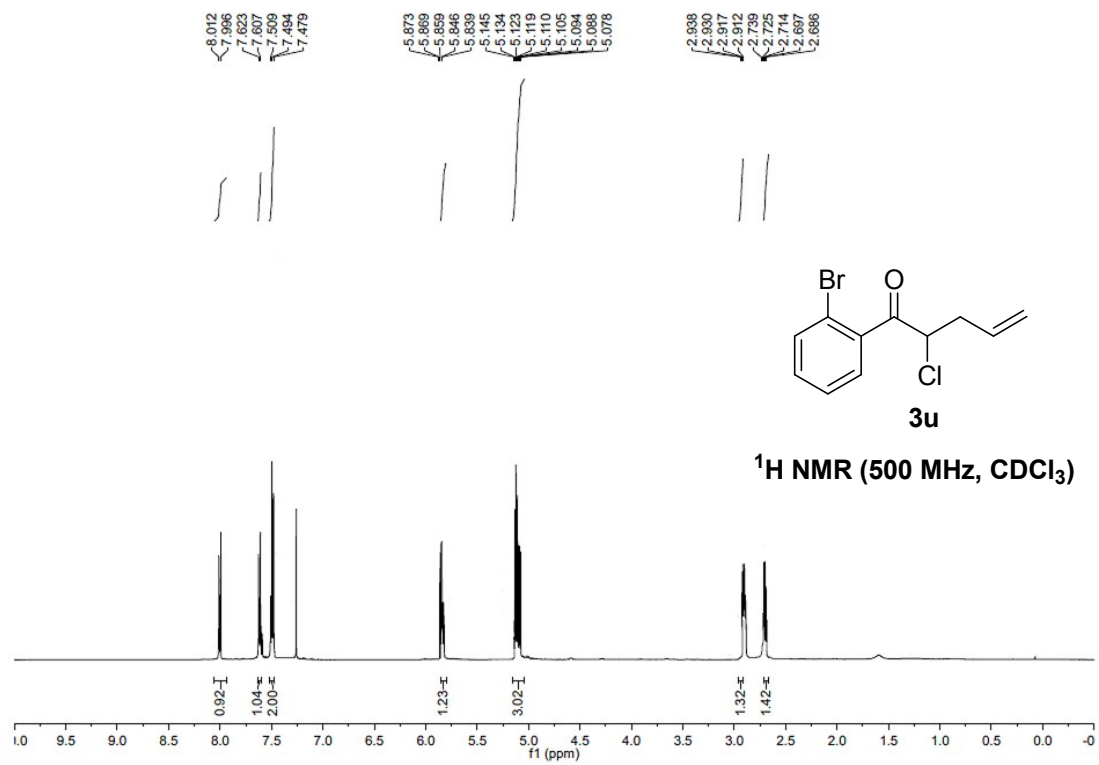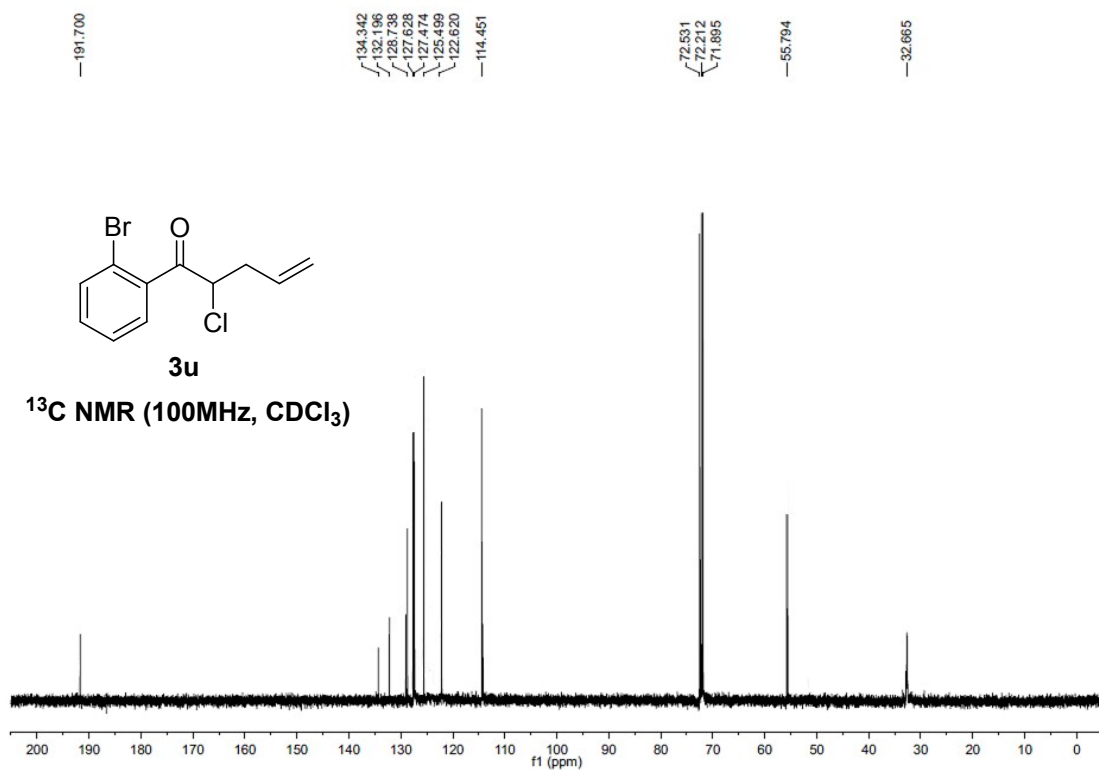

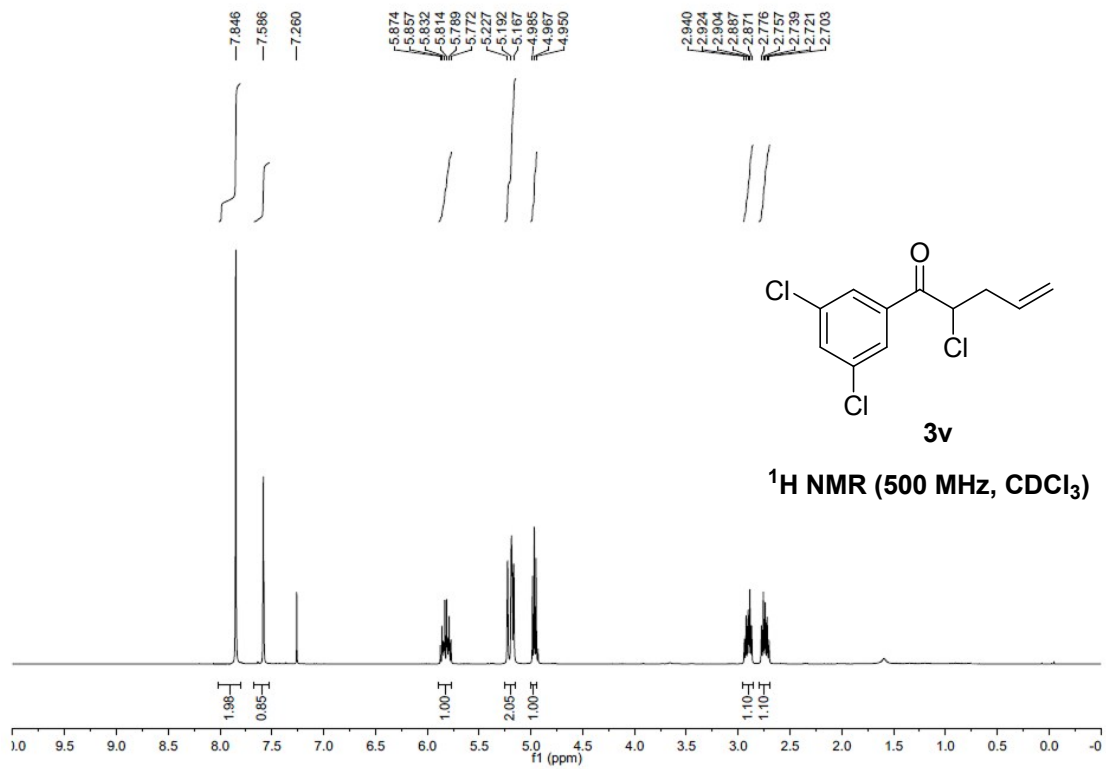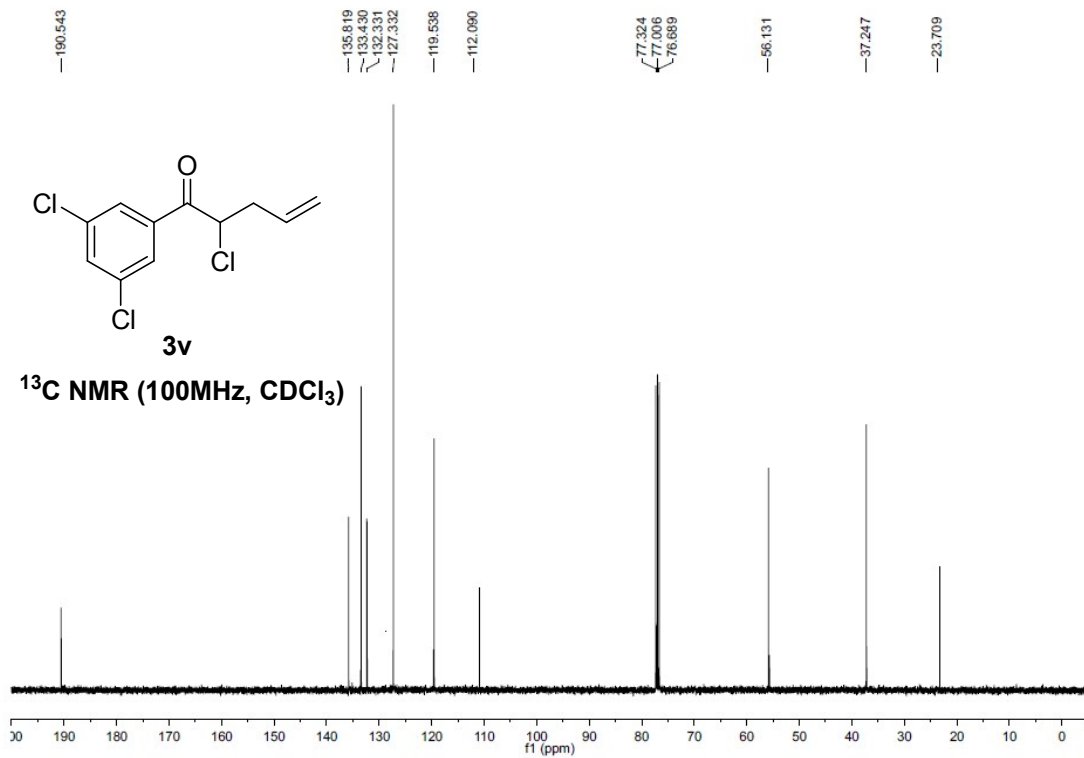

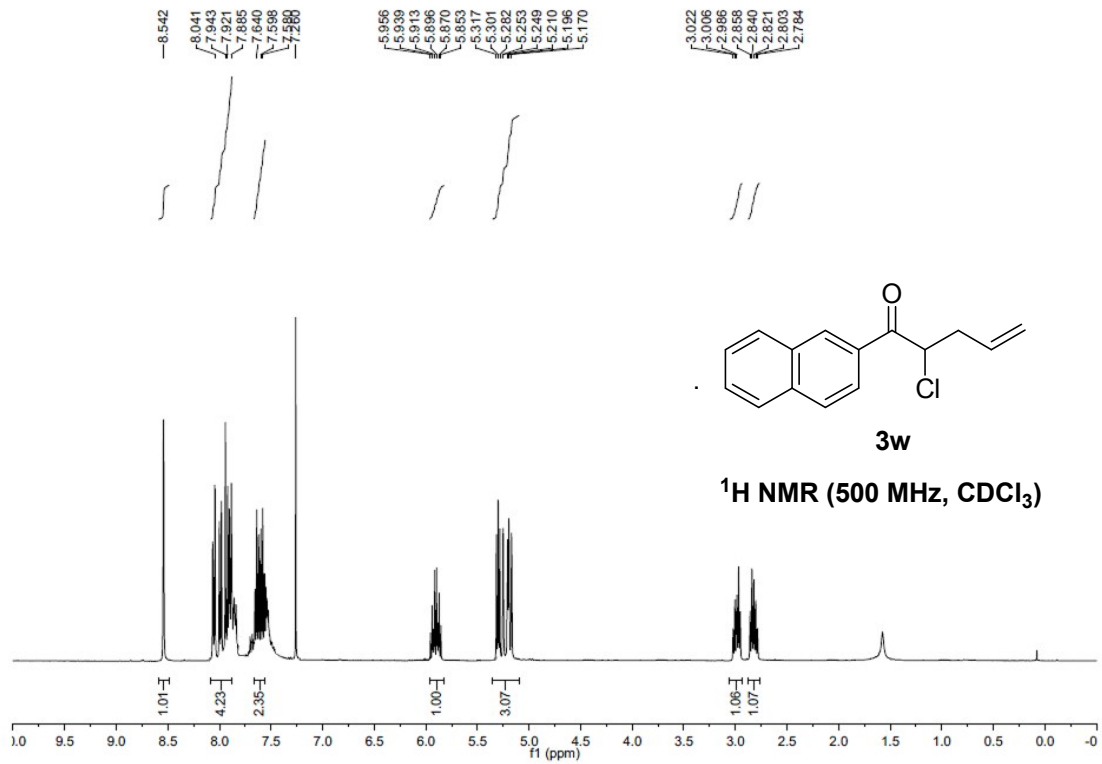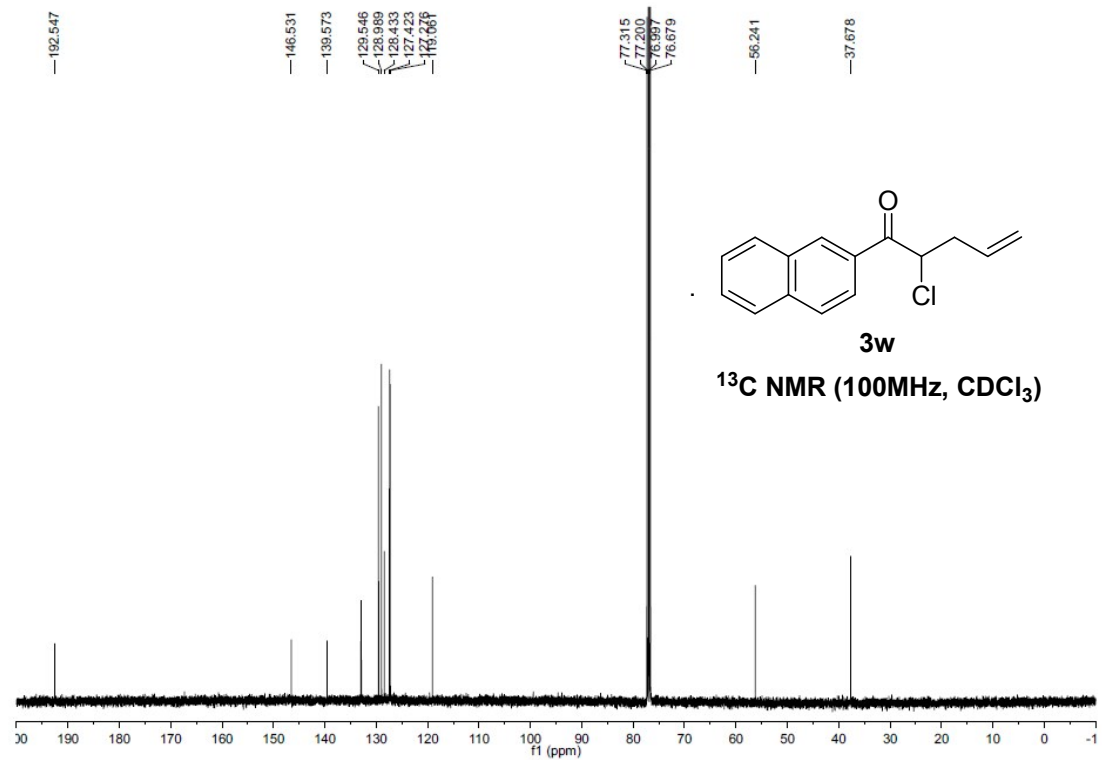



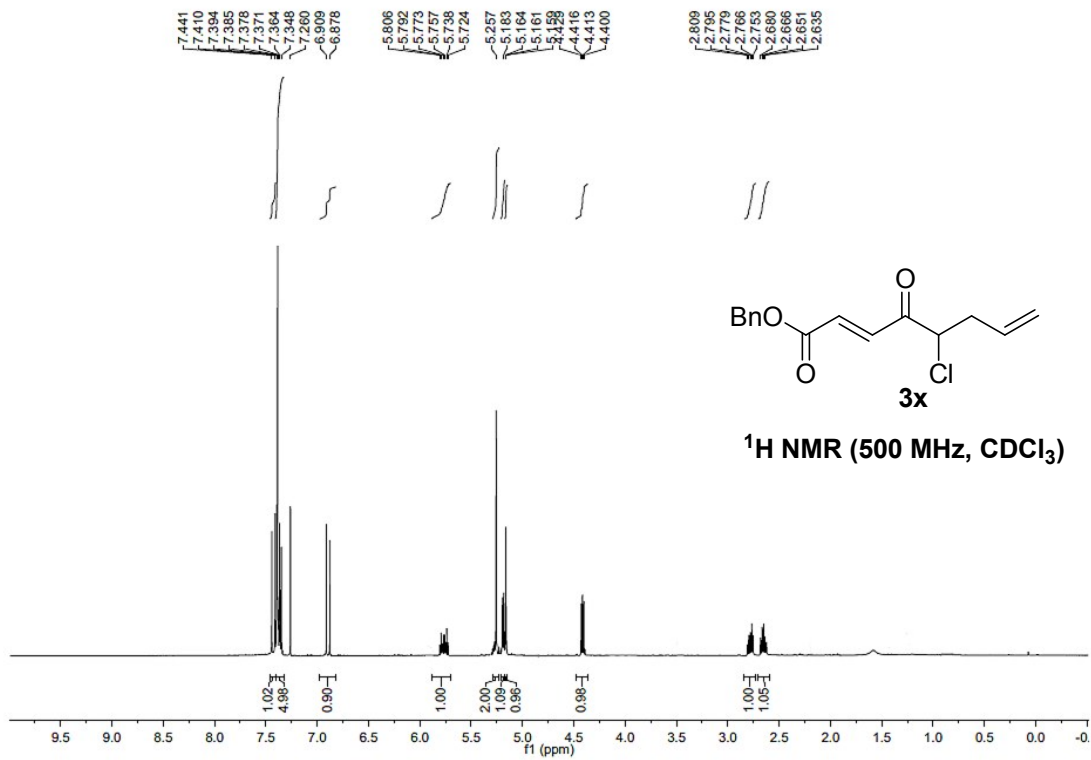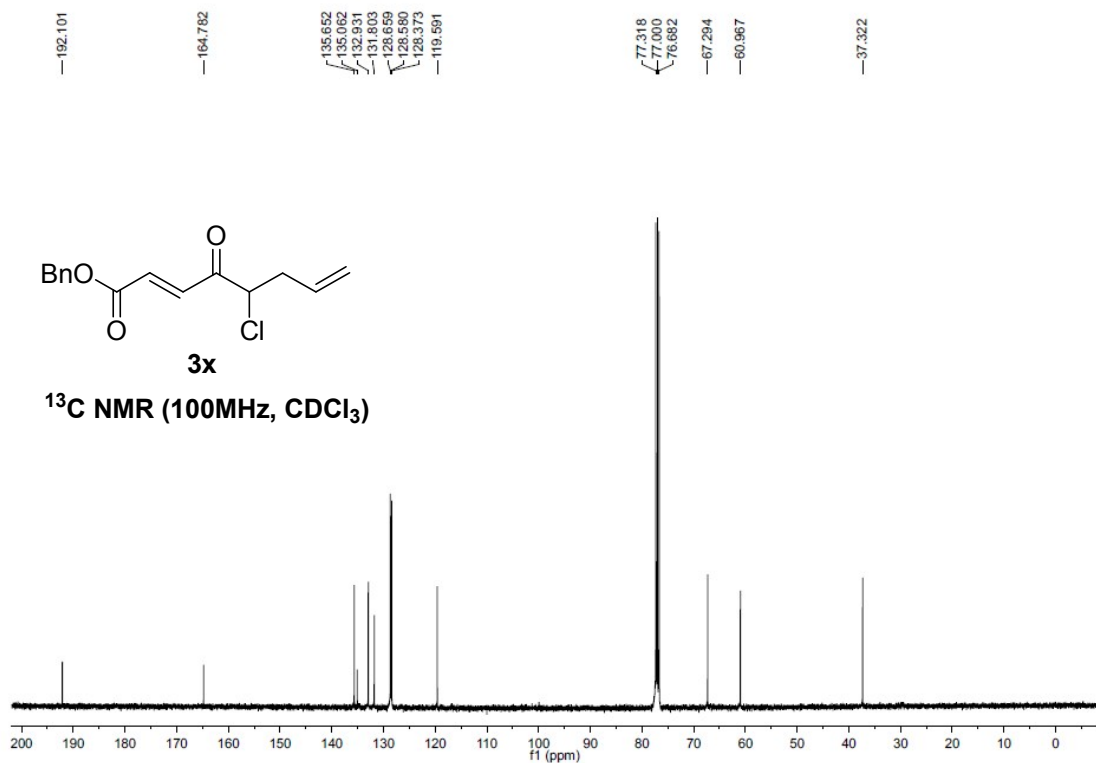

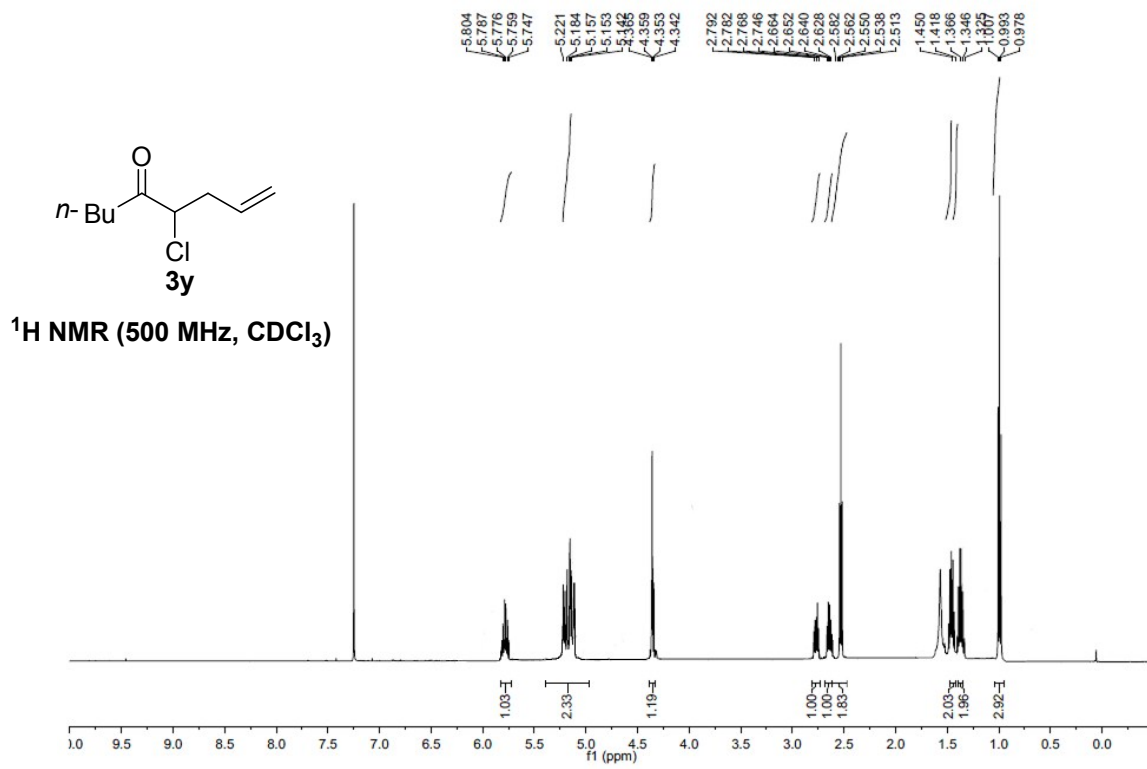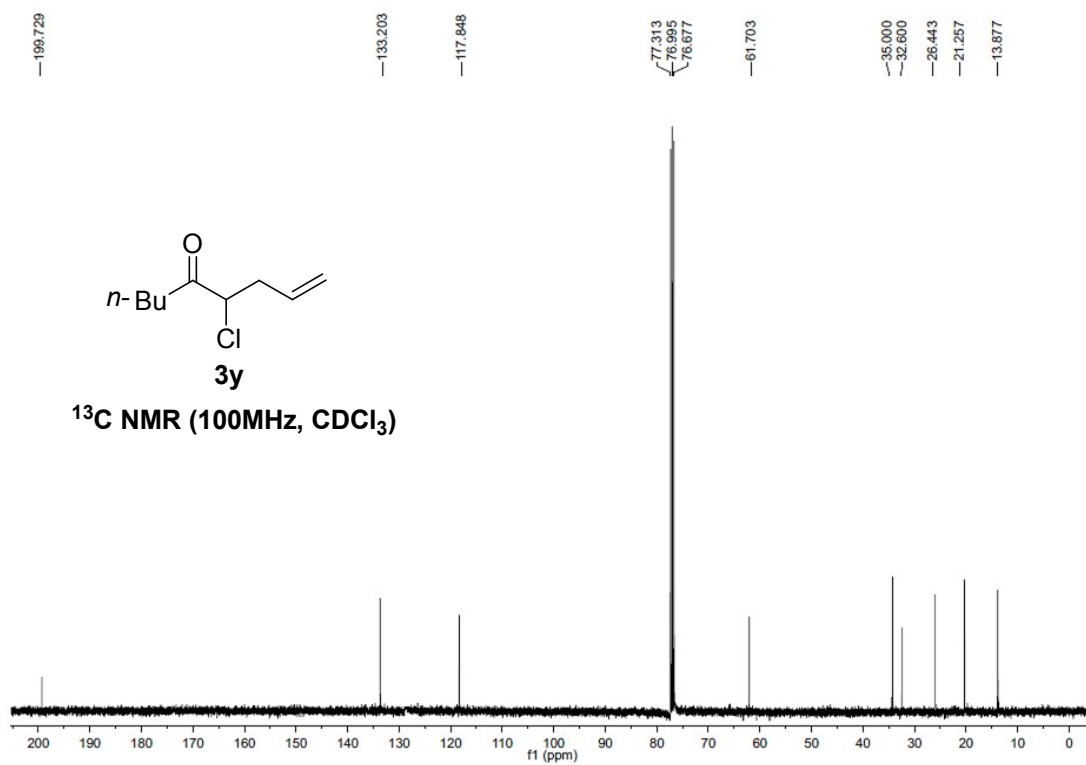

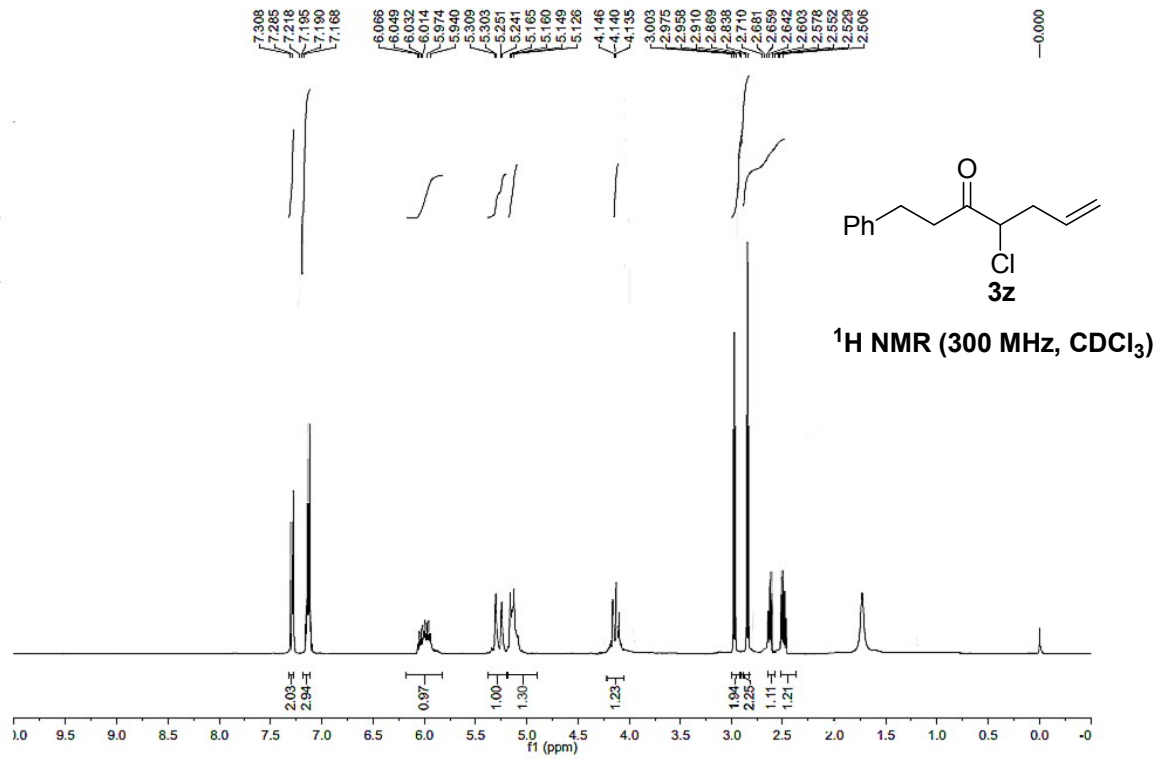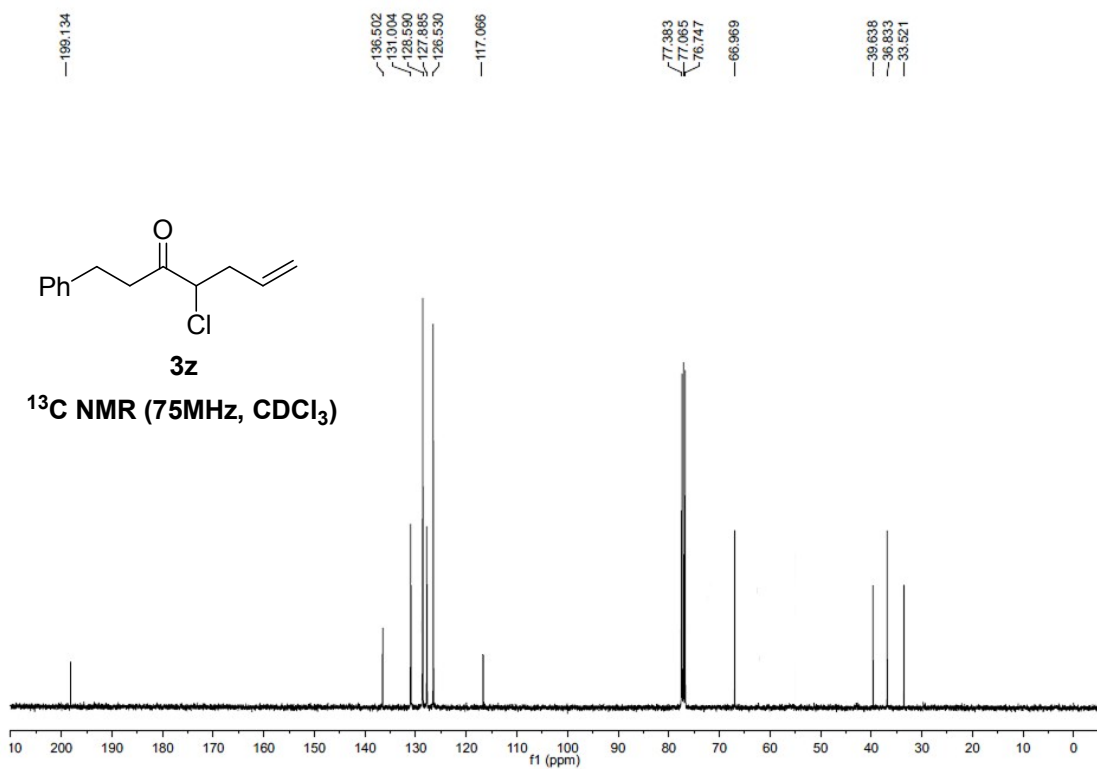

Supplement: c9ob00151d1.pdf [file c9ob00151d1.pdf]
